# Supplementary material for: Assessment of the reduction methods used to develop chemical schemes: building of a new chemical scheme for VOC oxidation suited to three-dimensional multiscale HO x -NO x -VOC chemistry simulations
Source: Copernicus journal article supplement (doi:10.5194/acp-5-2519-2005), 2005-09-22

## Appendix B

Concentration time series for organic functionalities simulated with the fully explicit chemical scheme and the pre-reduced chemical scheme. Results are for hexane and isoprene oxidation with initial mixing ratio set to 1 ppb. The simulation are run for 5 days under 4 NO<sub>x</sub> conditions: 3 cases in which the NO<sub>x</sub> level is set to a fixed value of 1 ppb, 100 ppt, 10 ppt ; and 1 case in which the NO<sub>x</sub> evolve freely starting with a mixing ratio of 1 ppb.

Hexane oxidation - NO<sub>x</sub> mixing ratio constrained to 1 ppb. Concentration time series for organic functionalities found in secondary VOC.

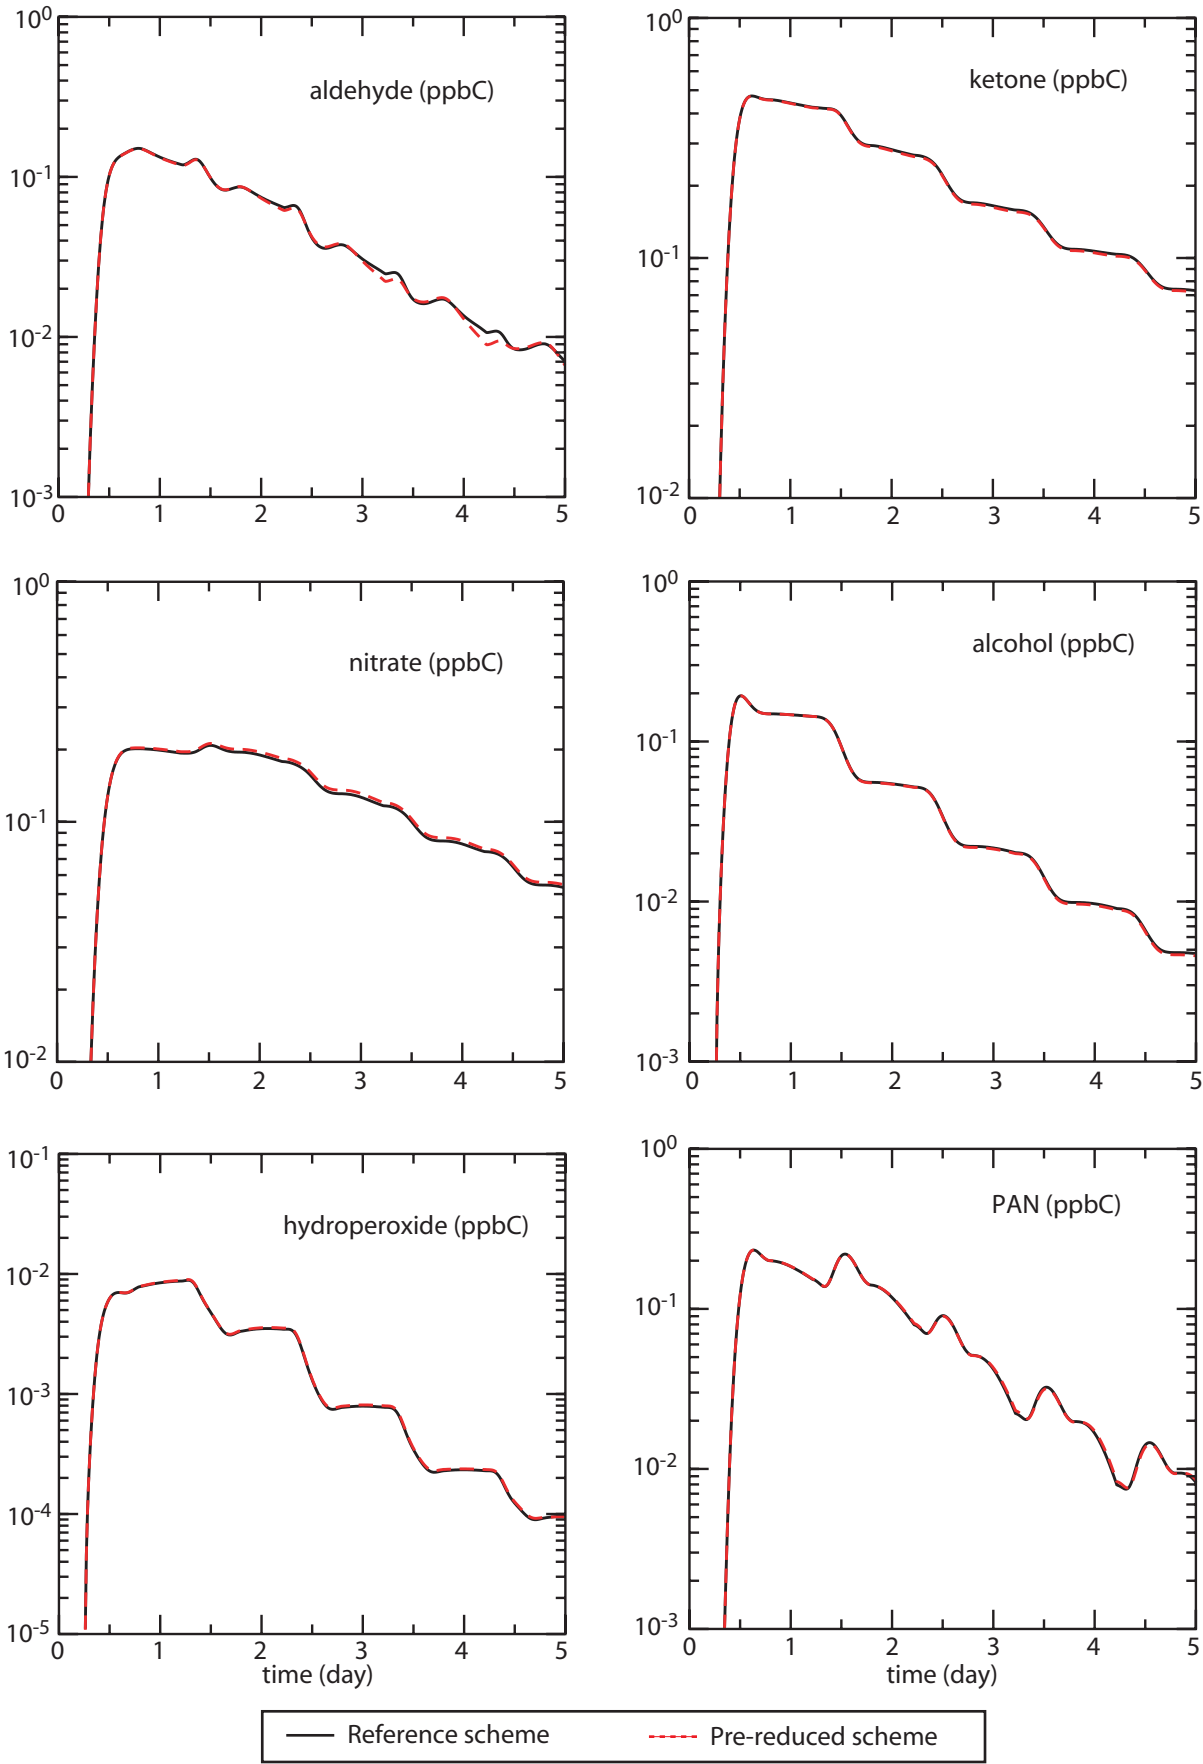

Hexane oxidation - NO<sub>x</sub> mixing ratio constrained to 100 ppt. Concentration time series for organic functionalities found in secondary VOC.

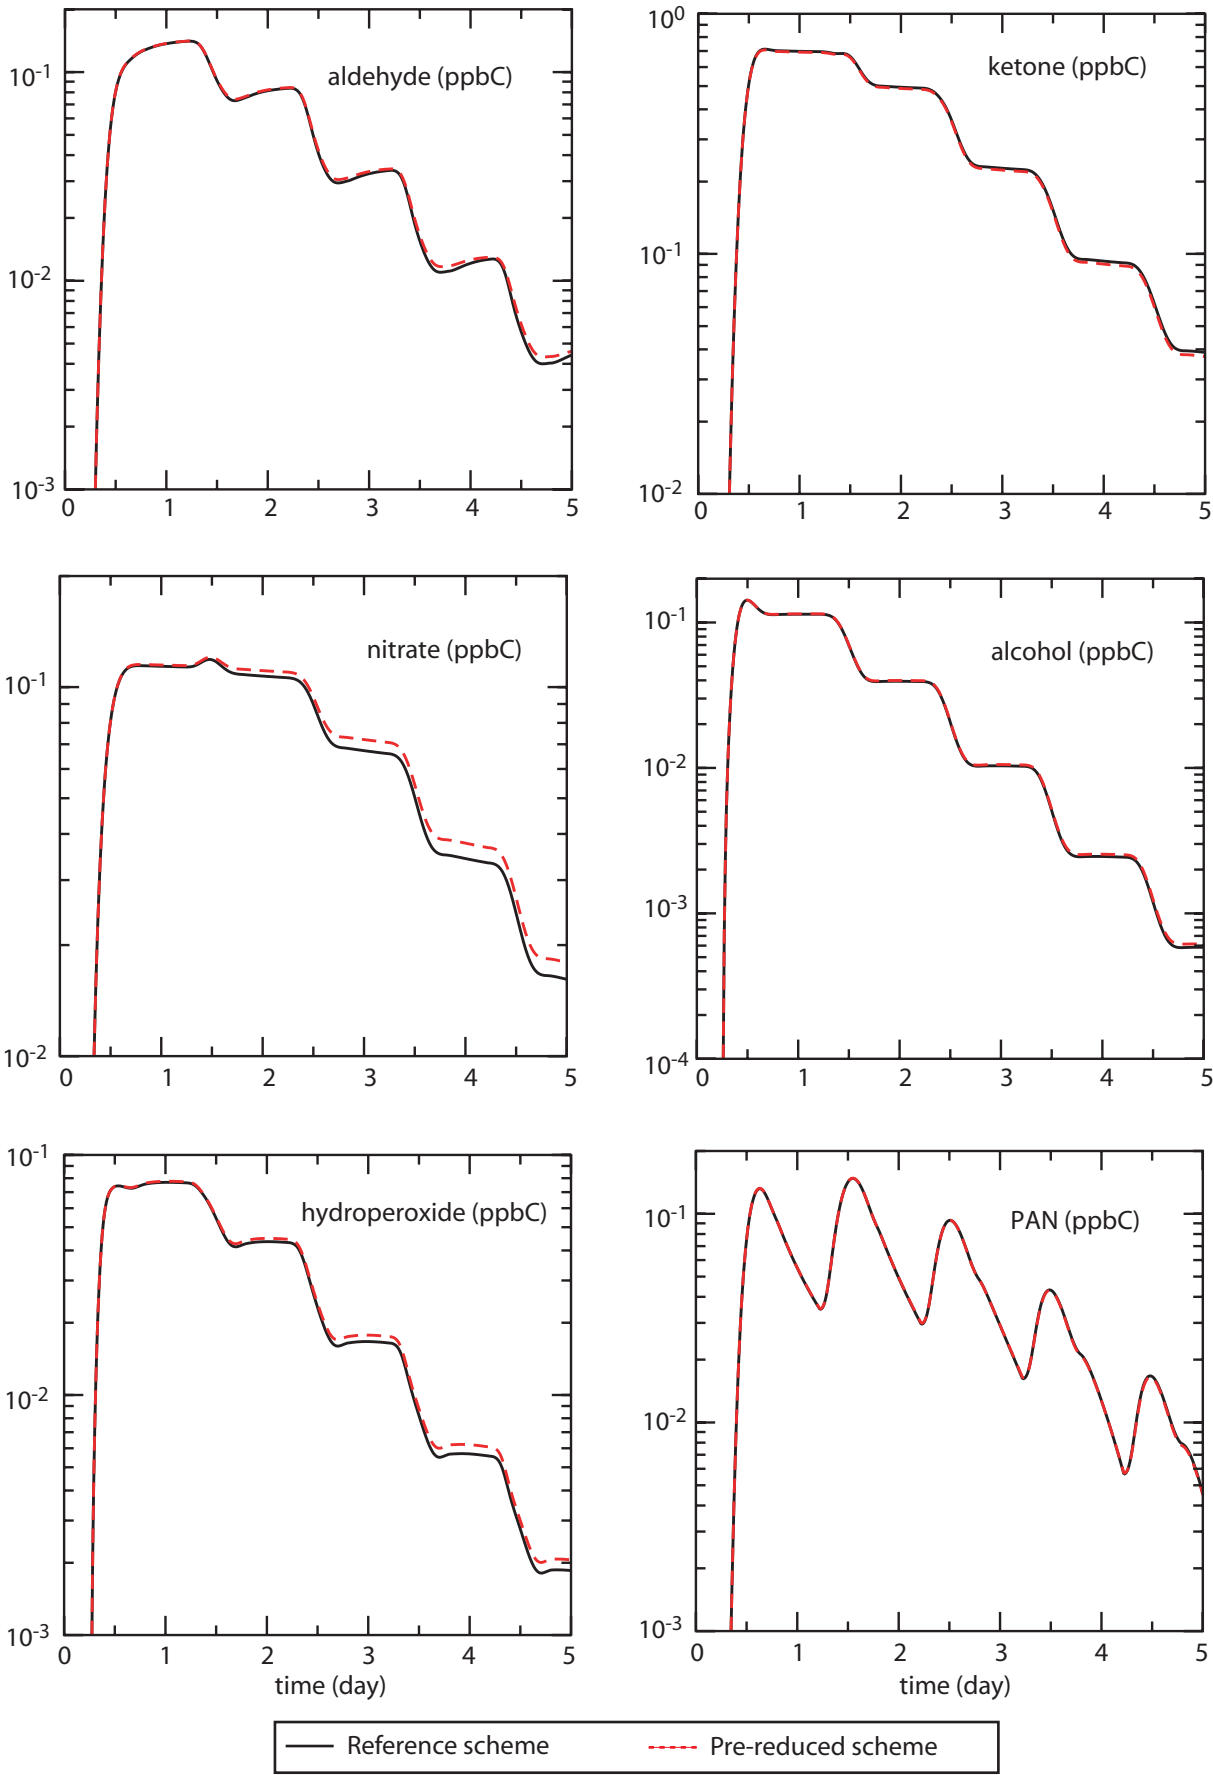

Hexane oxidation - NO<sub>x</sub> mixing ratio constrained to 10 ppt. Concentration time series for organic functionalities found in secondary VOC.

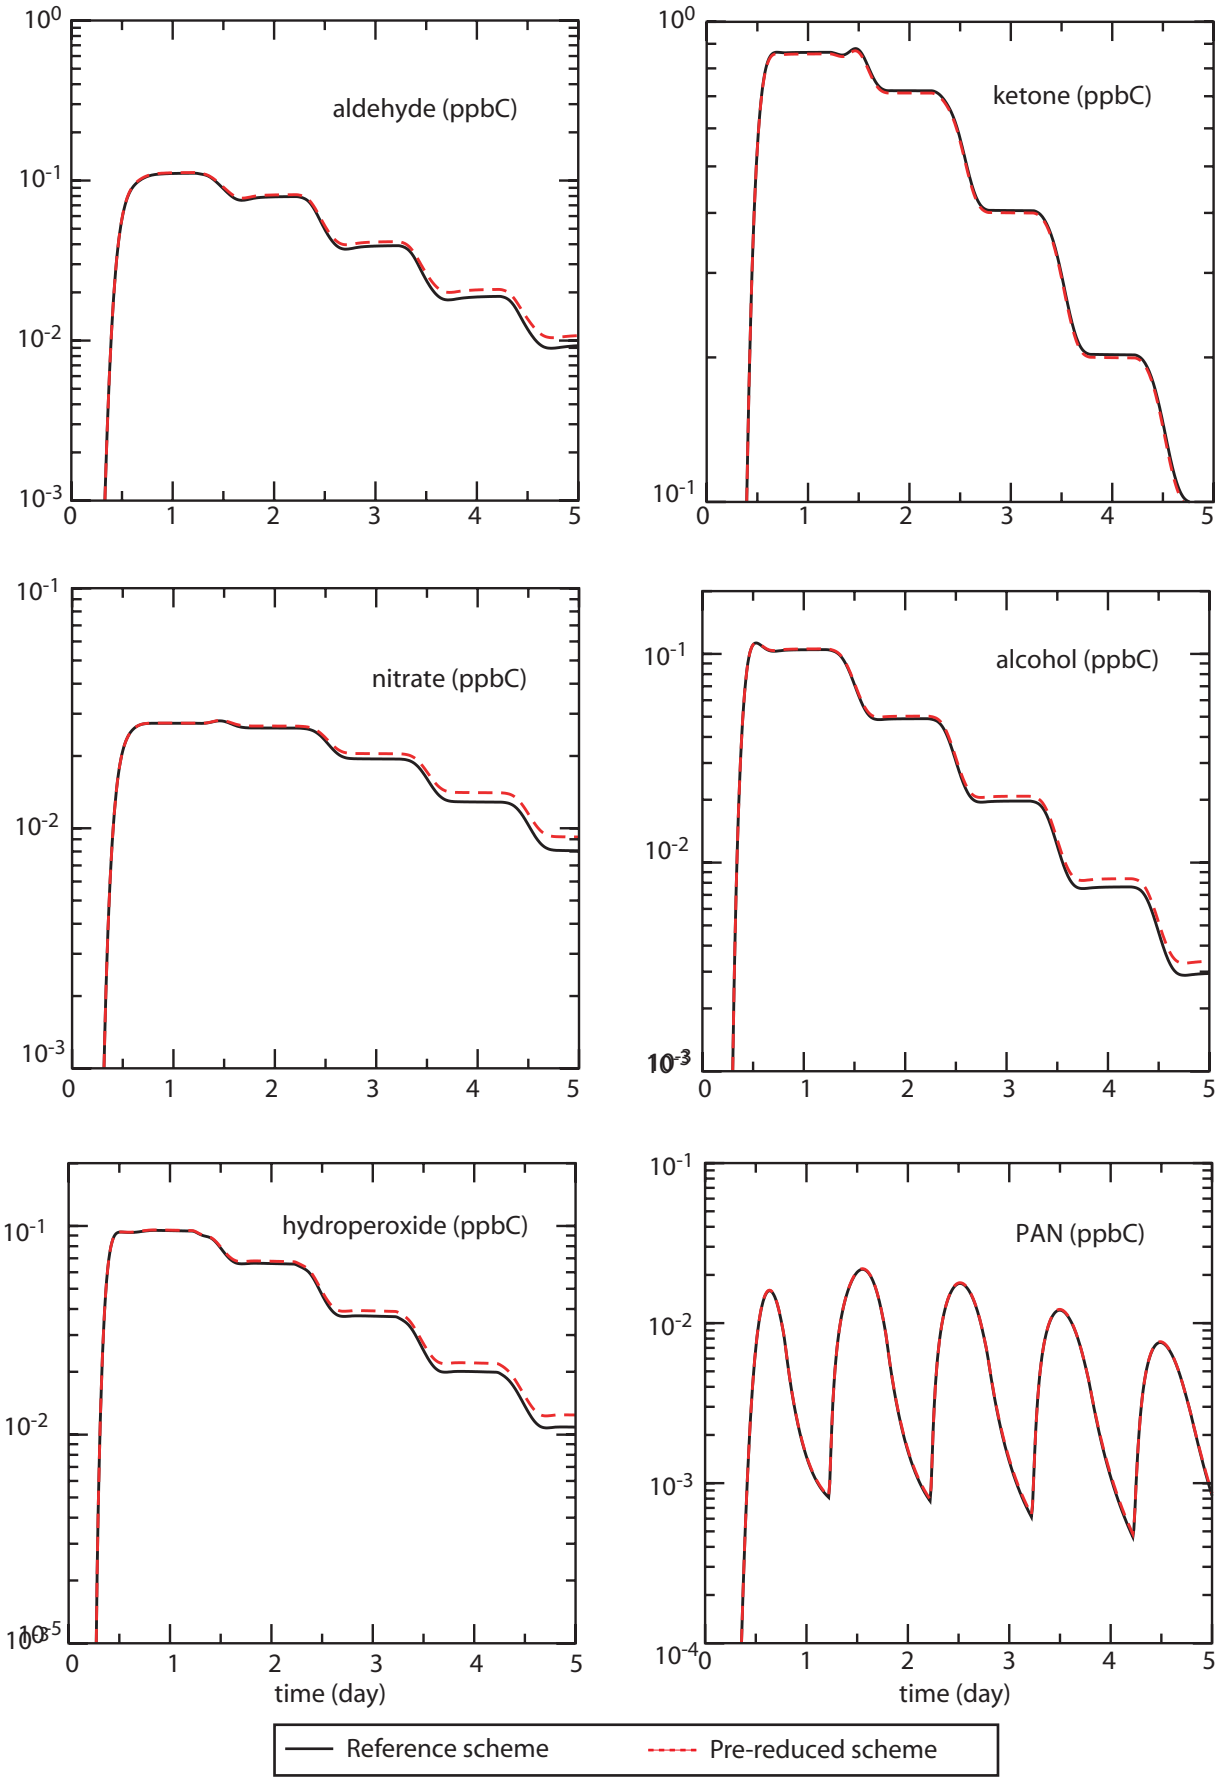

Hexane oxidation – NO<sub>x</sub> not constrained and set to an initial mixing ratio of 1 ppb.  
Concentration time series for organic functionalities found in secondary VOC.

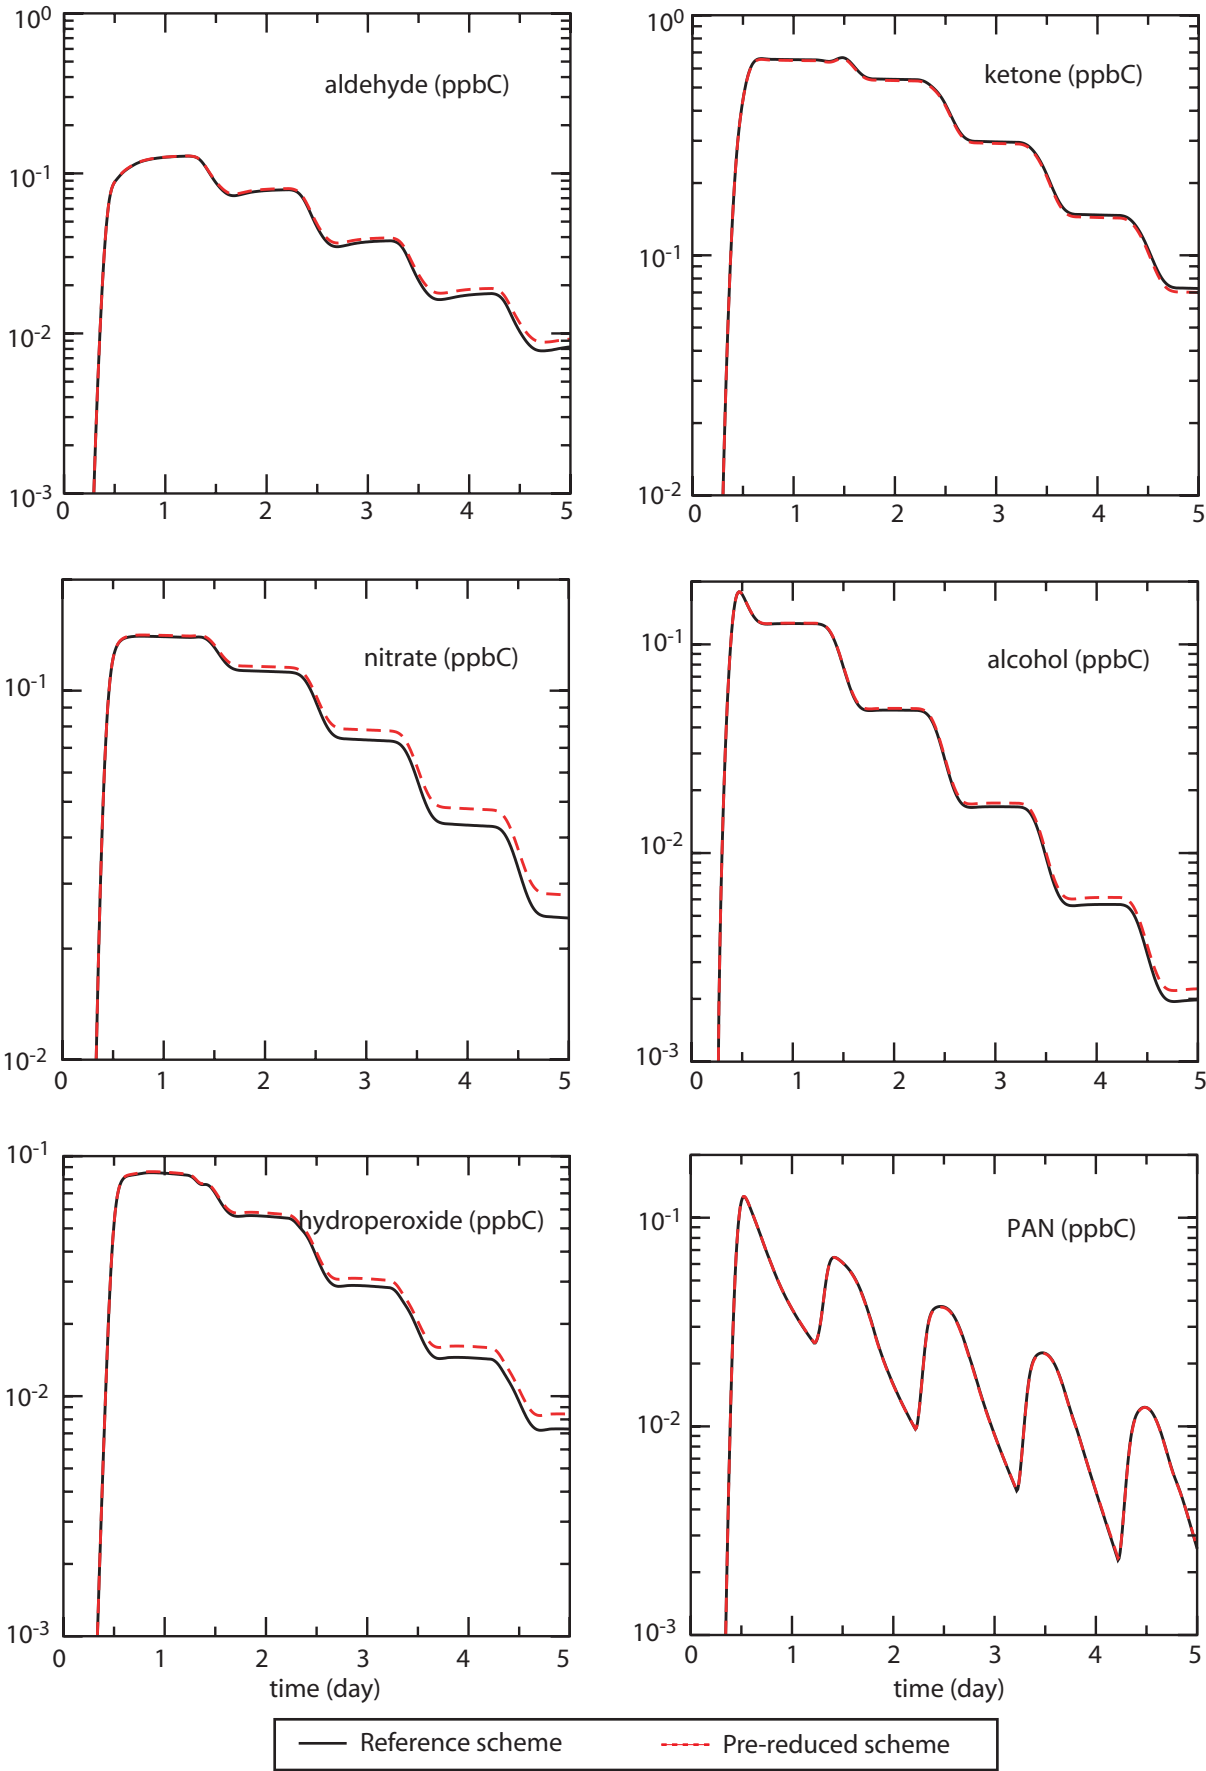

Isoprene oxidation under 1 ppb fixed NO<sub>x</sub> mixing ratio. Concentration time series for organic functionalities found in secondary VOC.

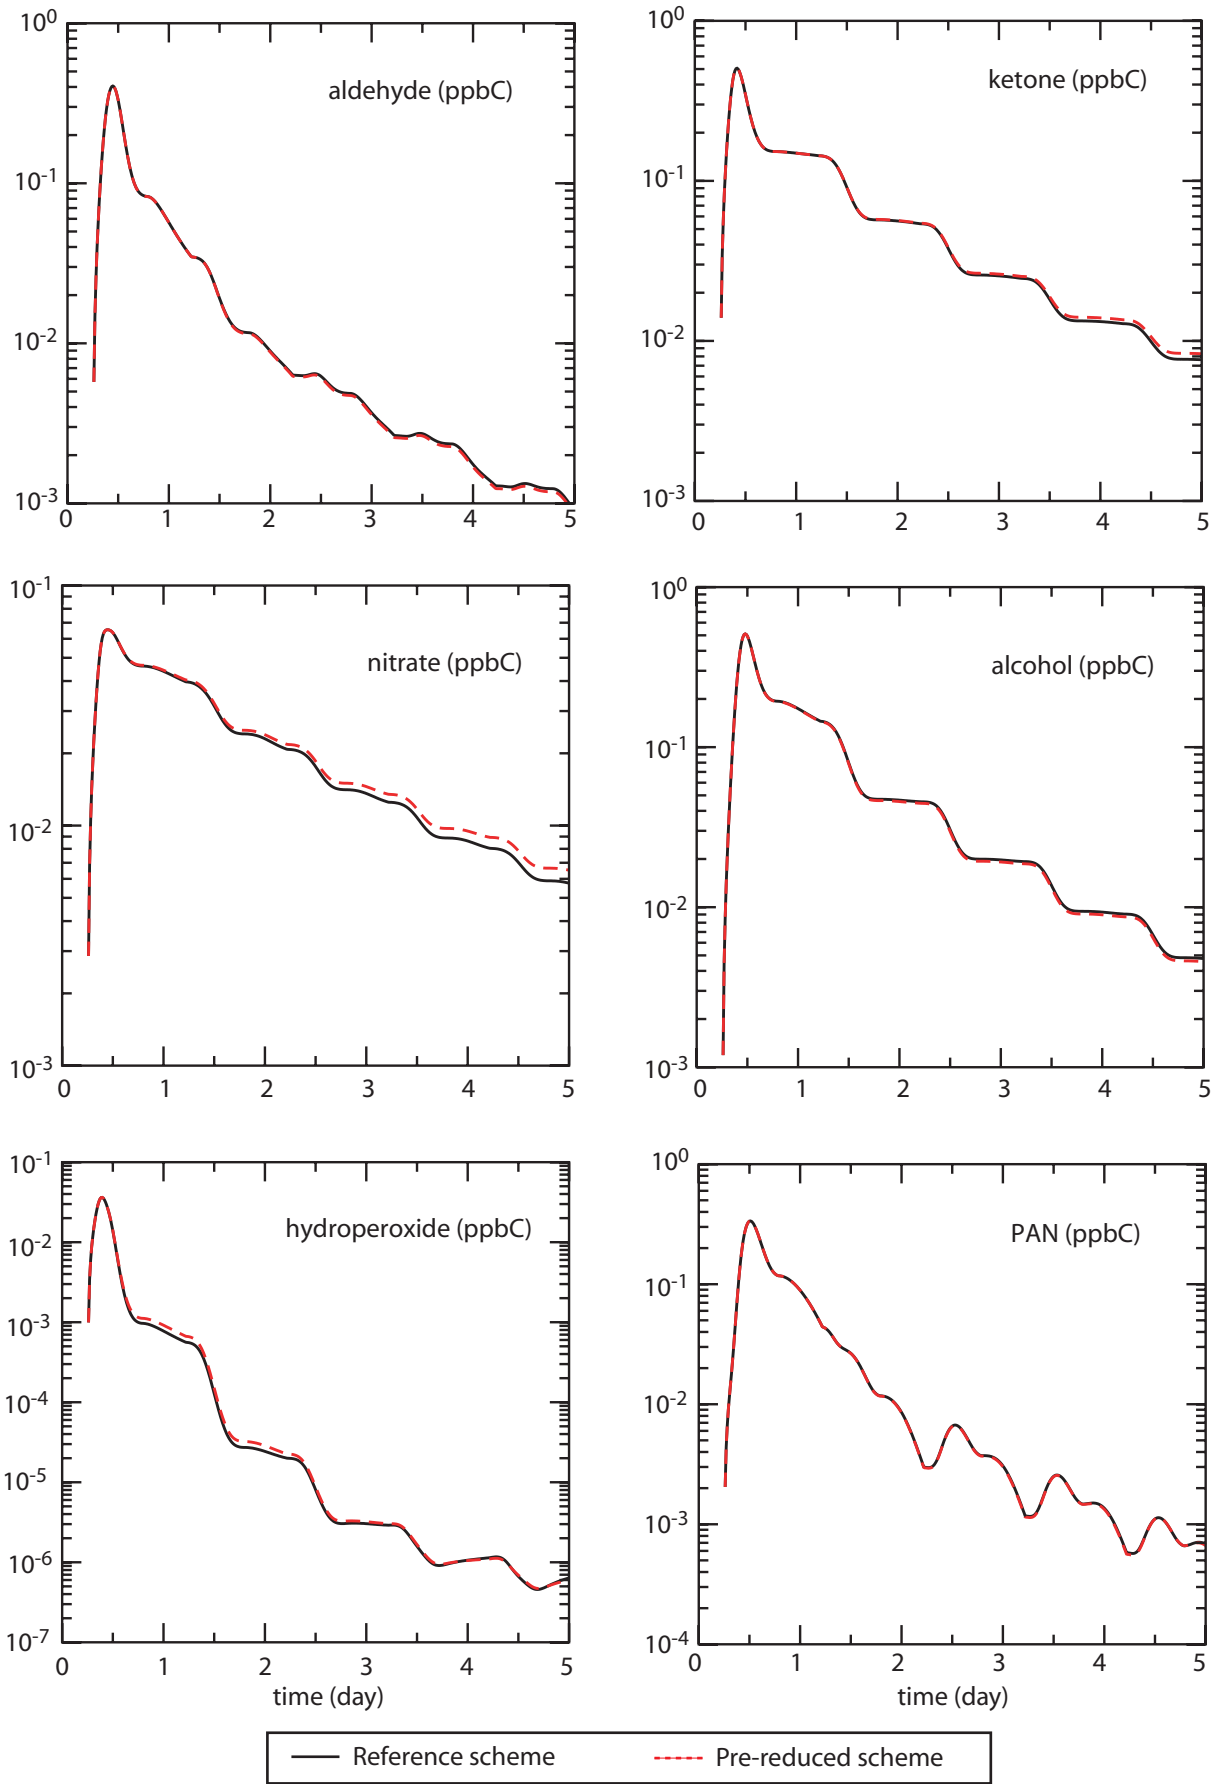

Isoprene oxidation under 100 ppt fixed NO<sub>x</sub> mixing ratio. Concentration time series for organic functionalities found in secondary VOC.

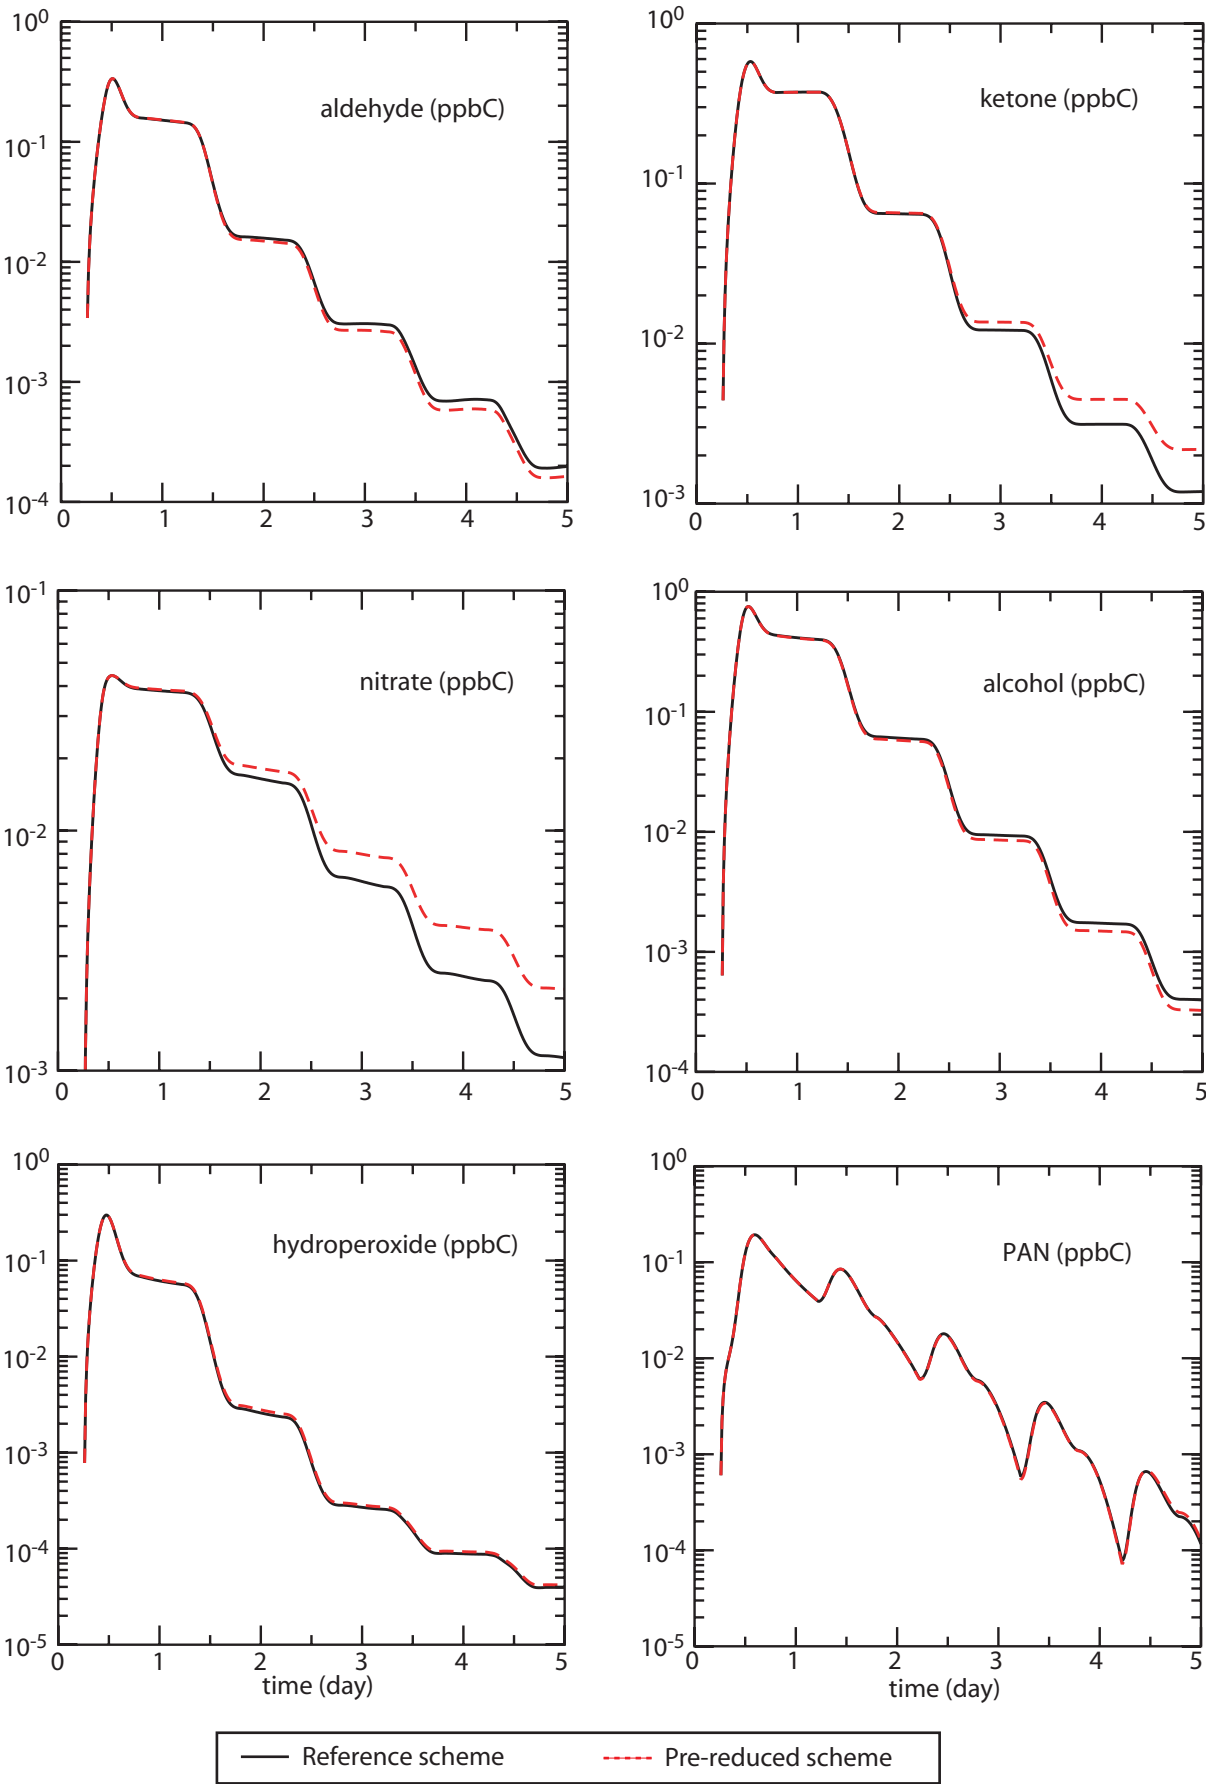

Isoprene oxidation under 10 ppt fixed NO<sub>x</sub> mixing ratio. Concentration time series for organic functionalities found in secondary VOC.

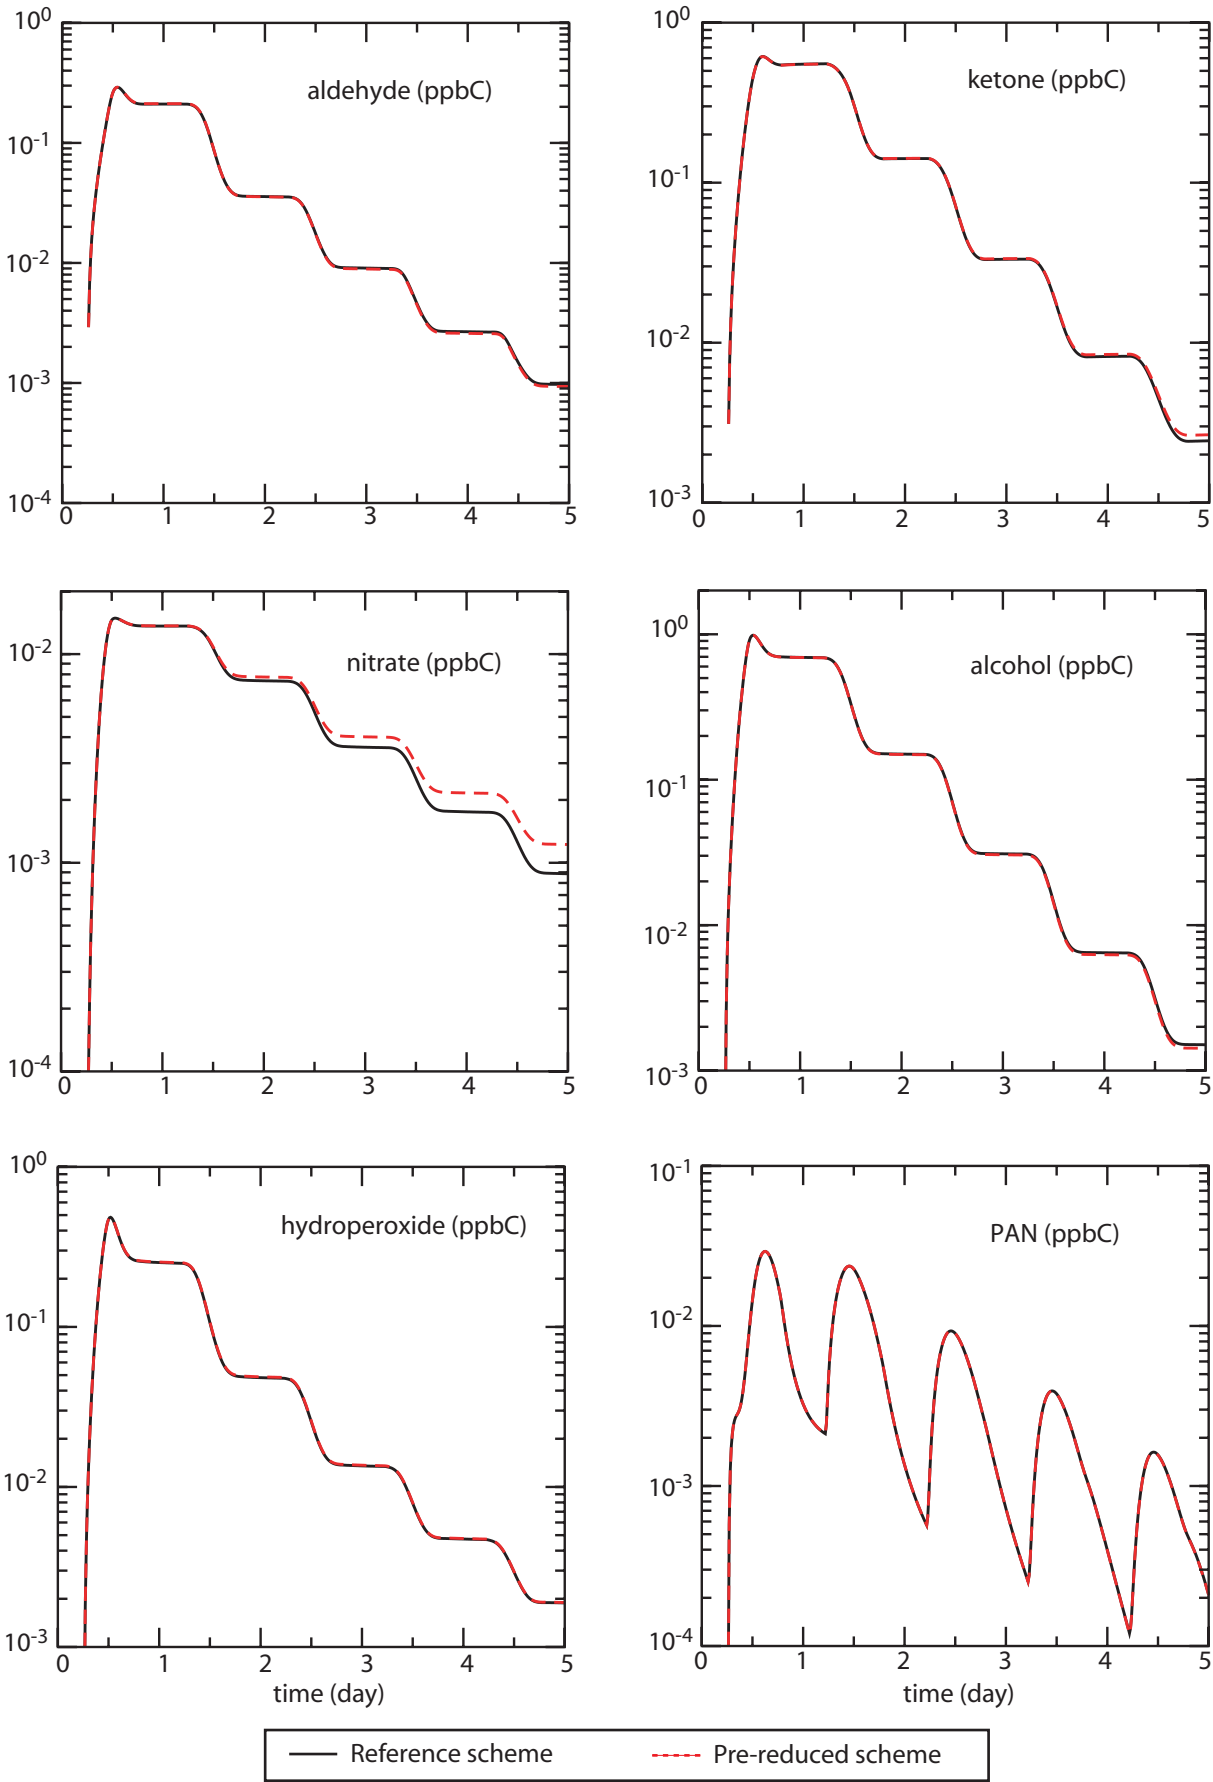



Isoprene oxidation – NO<sub>x</sub> not constrained and set to an initial mixing ratio of 1 ppb.  
Concentration time series for organic functionalities found in secondary VOC.

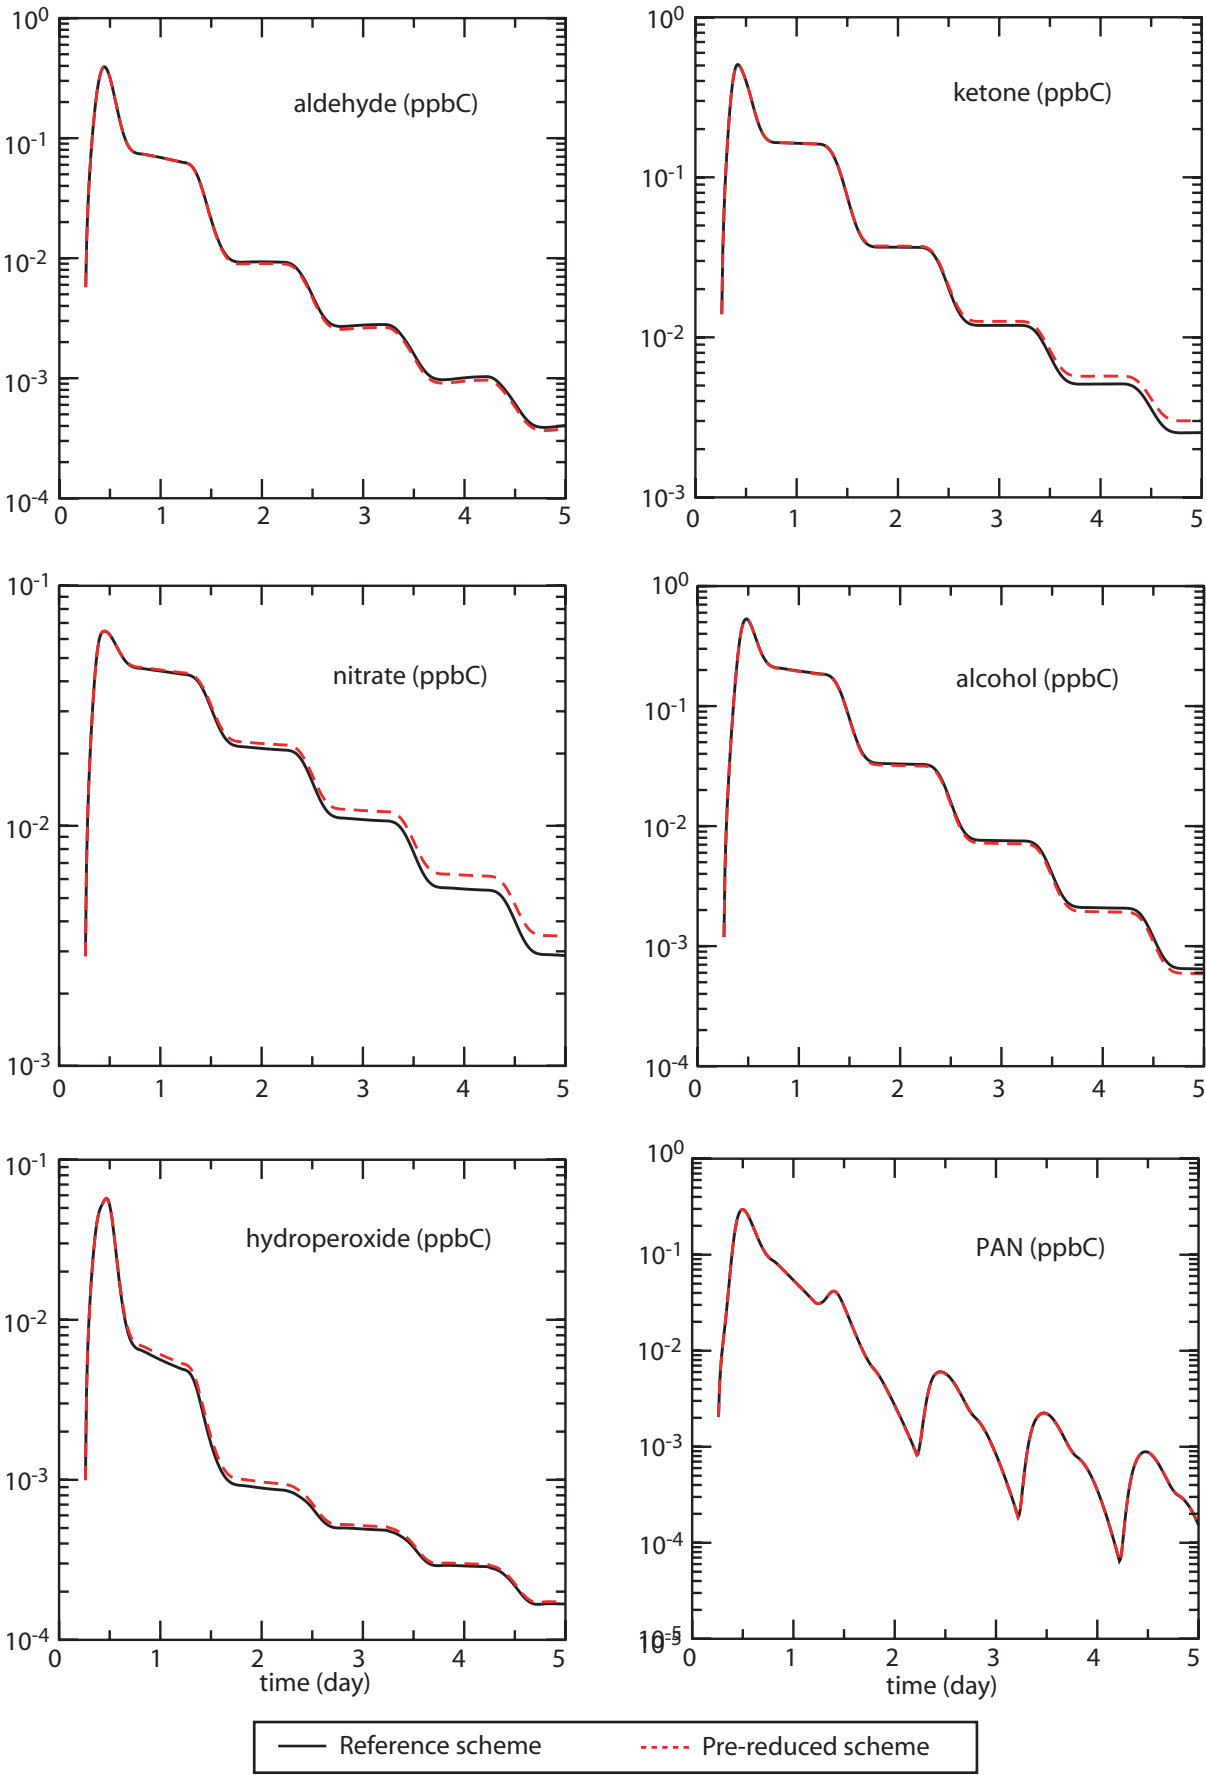

Supplement: Supplementary file 2 [file acp-5-2519-sp2.pdf › acp-5-2519-sp2.pdf]
