# Supplementary material for: Assessment of the reduction methods used to develop chemical schemes: building of a new chemical scheme for VOC oxidation suited to three-dimensional multiscale HO x -NO x -VOC chemistry simulations
Source: Copernicus journal article supplement (doi:10.5194/acp-5-2519-2005), 2005-09-22
Supplement: Supplementary file 1 [file acp-5-2519-sp1.pdf › acp-5-2519-sp1.pdf]

# Appendix A

## Reduced Chemical Scheme

*Denomination for the organic peroxy operators*

**The different types of <peroxy> operators**

<RO2> : successive NO/NO<sub>2</sub> conversions, final restitution of HO<sub>2</sub>

<OHRO2> : successive NO/NO<sub>2</sub> conversions, final restitution of OH

<2NO2> : successive NO/NO<sub>2</sub> conversions, final restitution of NO<sub>2</sub>

<NONO2> : successive NO/NO<sub>2</sub> conversions

<NONO2\_C> : successive NO/NO<sub>2</sub> conversions, final restitution of CH<sub>3</sub>O<sub>2</sub>

<NITR> : NO removal and formation of a nitrate species

**Information in the operator's names**

↗ type of operator

<xRO2\_ab...n>

↓

↘ type of <peroxy> that will be successively produced

number of NO/NO<sub>2</sub> conversions

ab..n are the following numbers or letters representing the type of <peroxy>:

2=alkylperoxy, peroxy permutation reactions considered;

7=alkylperoxy, no peroxy permutation reactions considered;

A=acylperoxy;

C=methylperoxy.

## List of the species

### Species invoked in the operators treatment

|              |                                                                                |
|--------------|--------------------------------------------------------------------------------|
| PAN2NONO2AC  | surrogate species representing PAN (0C)                                        |
| CA2NONO2AC   | surrogate species representing the carboxylic acids (0C)                       |
| PA2NONO2AC   | surrogate species representing the peracides (0C)                              |
| HP2RO2_22    | surrogate species representing an hydroperoxyde (0C)                           |
| HP1NITR02    | surrogate species representing an hydroperoxyde (0C)                           |
| OPEALC       | surrogate species representing an alcohol (0C))                                |
| <1RO2_2>     | operator giving HO <sub>2</sub> after one NO/NO <sub>2</sub> conversion        |
| <1RO2_7>     | operator giving HO <sub>2</sub> after one NO/NO <sub>2</sub> conversion        |
| <1RO2_A>     | operator giving HO <sub>2</sub> after one NO/NO <sub>2</sub> conversion        |
| <2RO2_2A>    | operator giving HO <sub>2</sub> after two NO/NO <sub>2</sub> conversions       |
| <2RO2_A2>    | operator giving HO <sub>2</sub> after two NO/NO <sub>2</sub> conversions       |
| <2RO2_22>    | operator giving HO <sub>2</sub> after two NO/NO <sub>2</sub> conversions       |
| <2RO2_72>    | operator giving HO <sub>2</sub> after two NO/NO <sub>2</sub> conversions       |
| <2RO2_27>    | operator giving HO <sub>2</sub> after two NO/NO <sub>2</sub> conversions       |
| <2RO2_77>    | operator giving HO <sub>2</sub> after two NO/NO <sub>2</sub> conversions       |
| <2RO2_A7>    | operator giving HO <sub>2</sub> after two NO/NO <sub>2</sub> conversions       |
| <3RO2_727>   | operator giving HO <sub>2</sub> after three NO/NO <sub>2</sub> conversions     |
| <3RO2_772>   | operator giving HO <sub>2</sub> after three NO/NO <sub>2</sub> conversions     |
| <3RO2_722>   | operator giving HO <sub>2</sub> after three NO/NO <sub>2</sub> conversions     |
| <3RO2_2A2>   | operator giving HO <sub>2</sub> after three NO/NO <sub>2</sub> conversions     |
| <1_2NO2_2>   | operator giving NO <sub>2</sub> after one NO/NO <sub>2</sub> conversion        |
| <1_2NO2_7>   | operator giving NO <sub>2</sub> after one NO/NO <sub>2</sub> conversion        |
| <1_2NO2_A>   | operator giving NO <sub>2</sub> after one NO/NO <sub>2</sub> conversion        |
| <2_2NO2_2A>  | operator giving NO <sub>2</sub> after two NO/NO <sub>2</sub> conversions       |
| <2_2NO2_72>  | operator giving NO <sub>2</sub> after two NO/NO <sub>2</sub> conversions       |
| <1OHR02_2>   | operator giving OH after one NO/NO <sub>2</sub> conversion                     |
| <2OHR02_A2>  | operator giving OH after two NO/NO <sub>2</sub> conversions NO/NO <sub>2</sub> |
| <1NONO2_2>   | operator converting NO to NO <sub>2</sub>                                      |
| <1NONO2_7>   | operator converting NO to NO <sub>2</sub>                                      |
| <1NONO2_A>   | operator converting NO to NO <sub>2</sub>                                      |
| <2NONO2_7C>  | operator converting NO to NO <sub>2</sub>                                      |
| <2NONO2_2C>  | operator converting NO to NO <sub>2</sub>                                      |
| <2NONO2_AC>  | operator converting NO to NO <sub>2</sub>                                      |
| <3NONO2_2AC> | operator converting NO to NO <sub>2</sub>                                      |
| <3NONO2_AAC> | operator converting NO to NO <sub>2</sub>                                      |
| <1NITR01#2>  | operator giving a surrogate nitrate                                            |
| <1NITR01#7>  | operator giving a surrogate nitrate                                            |
| <1NITR02#2>  | operator giving a surrogate nitrate                                            |
| <1NITR02#7>  | operator giving a surrogate nitrate                                            |
| <1N03001#2>  | operator giving a surrogate nitrate                                            |
| <1N03001#7>  | operator giving a surrogate nitrate                                            |
| R2O2         | operator R2O2 from Carter (SAPRC99)                                            |
| RO2N         | operator RO2N from Carter (SAPRC99)                                            |
| RO2R         | operator RO2R from Carter (SAPRC99)                                            |
| NITR01       | surrogate nitrate                                                              |
| NITR02       | surrogate nitrate                                                              |

### Inorganic species

|      |      |
|------|------|
| O3   | O3   |
| H2   | H2   |
| H2O2 | H2O2 |
| HNO2 | HNO2 |

|      |                  |
|------|------------------|
| HNO4 | HNO4             |
| HO   | HO               |
| HO2  | HO2              |
| N2O5 | N2O5             |
| NO   | NO               |
| NO2  | NO2              |
| NO3  | NO3              |
| O1D  | O1D              |
| O3P  | O3P              |
| SO2  | SO2              |
| SULF | SULF             |
| XC   | lost carbon      |
| CO   | CO               |
| CO2  | CO2              |
| HNO3 | HNO <sub>3</sub> |
| XN2  | lost nitrogen    |

#### Organic C1 species

|        |          |
|--------|----------|
| CH4    | CH4      |
| HCOOH  | HCO(OH)  |
| CH2O   | HCHO     |
| CH3OH  | CH3(OH)  |
| CH3OOH | CH3(OOH) |
| CH3O2  | CH3(OO.) |

#### Species from the Carter's parameterization (SAPRC99)

|        |                                             |
|--------|---------------------------------------------|
| T124B  | 124_trimethylbenzene                        |
| BUTYN  | 2_butyne                                    |
| ACTYN  | acetylene                                   |
| APIN   | alphapinene                                 |
| DCB1   | fragment from the DCB1 aromatic degradation |
| DCB2   | fragment from the DCB2 aromatic degradation |
| DCB3   | fragment from the DCB3 aromatic degradation |
| BALD   | benzaldehyde                                |
| BENZ   | benzene                                     |
| BZCOO2 | benzylacylperoxy                            |
| CRES   | cresol                                      |
| ETBNZ  | ethylbenzene                                |
| LIMO   | limonene                                    |
| XN     | lost nitrogen                               |
| NPHE   | nitrophenol                                 |
| BZNO2O | nitrophenoxy                                |
| PBZN   | peroxybenzylnitrate                         |
| PHEN   | phenol                                      |
| BZO    | phenoxy                                     |
| TOL    | toluene                                     |

#### Primary and secondary organic species

|        |                      |
|--------|----------------------|
| DO2000 | CH2(OH)CHO           |
| DK3000 | CH2(OH)COCHO         |
| ND2000 | CH2(ONO2)CHO         |
| NN3001 | CH2(ONO2)COCH2(ONO2) |
| ND3000 | CH2(ONO2)COCHO       |
| NU4000 | CH2(ONO2)COCH=CH2    |
| NU3000 | CH2(ONO2)CH=CH2      |
| EK5001 | CH3CH(CH3)-O-COCH3   |

|        |                                                                                                                                 |
|--------|---------------------------------------------------------------------------------------------------------------------------------|
| C08005 | CH <sub>3</sub> CH(CH <sub>3</sub> )CH <sub>2</sub> CH <sub>2</sub> CH <sub>2</sub> CH <sub>2</sub> CH <sub>3</sub>             |
| C06001 | CH <sub>3</sub> CH(CH <sub>3</sub> )CH <sub>2</sub> CH <sub>2</sub> CH <sub>3</sub>                                             |
| K06001 | CH <sub>3</sub> CH(CH <sub>3</sub> )CH <sub>2</sub> COCH <sub>3</sub>                                                           |
| C04001 | CH <sub>3</sub> CH(CH <sub>3</sub> )CH <sub>3</sub>                                                                             |
| D04001 | CH <sub>3</sub> CH(CH <sub>3</sub> )CHO                                                                                         |
| N03001 | CH <sub>3</sub> CH(ONO <sub>2</sub> )CH <sub>3</sub>                                                                            |
| N03002 | CH <sub>3</sub> CH(ONO <sub>2</sub> )CHO                                                                                        |
| O02000 | CH <sub>3</sub> CH <sub>2</sub> (OH)                                                                                            |
| EK4000 | CH <sub>3</sub> CH <sub>2</sub> -O-COCH <sub>3</sub>                                                                            |
| H03000 | CH <sub>3</sub> CH <sub>2</sub> CH <sub>2</sub> (OOH)                                                                           |
| N05001 | CH <sub>3</sub> CH <sub>2</sub> CH <sub>2</sub> CH(ONO <sub>2</sub> )CH <sub>3</sub>                                            |
| EK6000 | CH <sub>3</sub> CH <sub>2</sub> CH <sub>2</sub> CH <sub>2</sub> -O-COCH <sub>3</sub>                                            |
| C08000 | CH <sub>3</sub> CH <sub>2</sub> CH <sub>2</sub> CH <sub>2</sub> CH <sub>2</sub> CH <sub>2</sub> CH <sub>2</sub> CH <sub>3</sub> |
| C06000 | CH <sub>3</sub> CH <sub>2</sub> CH <sub>2</sub> CH <sub>2</sub> CH <sub>2</sub> CH <sub>3</sub>                                 |
| K06000 | CH <sub>3</sub> CH <sub>2</sub> CH <sub>2</sub> CH <sub>2</sub> COCH <sub>3</sub>                                               |
| C04000 | CH <sub>3</sub> CH <sub>2</sub> CH <sub>2</sub> CH <sub>3</sub>                                                                 |
| D04000 | CH <sub>3</sub> CH <sub>2</sub> CH <sub>2</sub> CHO                                                                             |
| C03000 | CH <sub>3</sub> CH <sub>2</sub> CH <sub>3</sub>                                                                                 |
| D03000 | CH <sub>3</sub> CH <sub>2</sub> CHO                                                                                             |
| A03000 | CH <sub>3</sub> CH <sub>2</sub> CO(OH)                                                                                          |
| G03000 | CH <sub>3</sub> CH <sub>2</sub> CO(OOH)                                                                                         |
| K04000 | CH <sub>3</sub> CH <sub>2</sub> COCH <sub>3</sub>                                                                               |
| U05004 | CH <sub>3</sub> CH <sub>2</sub> C(CH <sub>3</sub> )=CH <sub>2</sub>                                                             |
| U04000 | CH <sub>3</sub> CH <sub>2</sub> CH=CH <sub>2</sub>                                                                              |
| C02000 | CH <sub>3</sub> CH <sub>3</sub>                                                                                                 |
| D02000 | CH <sub>3</sub> CHO                                                                                                             |
| A02000 | CH <sub>3</sub> CO(OH)                                                                                                          |
| EK3000 | CH <sub>3</sub> CO-O-CH <sub>3</sub>                                                                                            |
| ED3000 | CH <sub>3</sub> CO-O-CHO                                                                                                        |
| NK3000 | CH <sub>3</sub> COCH <sub>2</sub> (ONO <sub>2</sub> )                                                                           |
| HK3000 | CH <sub>3</sub> COCH <sub>2</sub> (OOH)                                                                                         |
| ACETO  | CH <sub>3</sub> COCH <sub>3</sub>                                                                                               |
| MGLYO  | CH <sub>3</sub> COCHO                                                                                                           |
| BIACE  | CH <sub>3</sub> COCOCH <sub>3</sub>                                                                                             |
| MVKET  | CH <sub>3</sub> COCH=CH <sub>2</sub>                                                                                            |
| U05003 | CH <sub>3</sub> C(CH <sub>3</sub> )=CHCH <sub>3</sub>                                                                           |
| MEACR  | CH <sub>3</sub> C(CHO)=CH <sub>2</sub>                                                                                          |
| U04002 | CH <sub>3</sub> CH=CHCH <sub>3</sub>                                                                                            |
| GLYOX  | CHOCHO                                                                                                                          |
| DD3002 | CHOCOCHO                                                                                                                        |
| AN2000 | CO(OH)CH <sub>2</sub> (ONO <sub>2</sub> )                                                                                       |
| AD3000 | CO(OH)CH <sub>2</sub> CHO                                                                                                       |
| AD2000 | CO(OH)CHO                                                                                                                       |
| ISO    | CH <sub>2</sub> =C(CH <sub>3</sub> )CH=CH <sub>2</sub>                                                                          |
| U02000 | CH <sub>2</sub> =CH <sub>2</sub>                                                                                                |
| U03000 | CH <sub>2</sub> =CHCH <sub>3</sub>                                                                                              |
| ACROL  | CH <sub>2</sub> =CHCHO                                                                                                          |

**Counter species for peroxy permutation reactions**

|         |                                                                                                                                                                                                                                   |
|---------|-----------------------------------------------------------------------------------------------------------------------------------------------------------------------------------------------------------------------------------|
| C_PERO2 | = <1NITR03#2> + <1RO2_2> + <1N03001#2> + <2RO2_2A> +<br><2RO2_22> + <1NONO2_2> + <2RO2_27> + <1NITR01#2> + <1NITR02#2><br><1_2NO2_2> + <3NONO2_2AC> + <3RO2_2A2> + <2NONO2_2C> +<br><1OHRO2_2> + <2_2NO2_2A> + R2O2 + RO2N + RO2R |
| C_PERO9 | = <2NONO2_AC> + <2RO2_A2> + <1NONO2_A> + <2RO2_A7> +<br><3NONO2_AAC> + <1RO2_A> + <1_2NO2_A> + <2OHRO2_A2> + BZCOO2                                                                                                               |

## HO<sub>x</sub>/NO<sub>x</sub>/O<sub>x</sub>/CO reactions

Table A.1: *Reactions for inorganic species - Kinetic rates on the form  $k=A.T^n.exp(-E_a/RT)$*

| Bimolecular reactions                                                                    | A (a)    | n    | E <sub>a</sub> /R (b) | References and notes   |
|------------------------------------------------------------------------------------------|----------|------|-----------------------|------------------------|
| O <sup>3</sup> P + O <sub>2</sub> + M => O <sub>3</sub>                                  | 5.28E-28 | -2.4 | 0.                    | Sander et al. [2000]   |
| O <sup>3</sup> P + O <sub>3</sub> => 2 O <sub>2</sub>                                    | 8.0E-12  | 0.   | 2060.                 | De More et al. [1997]  |
| O <sup>3</sup> P + NO <sub>2</sub> => NO                                                 | 5.6E-12  | 0.   | -180                  | Sander et al. [2000]   |
| O <sup>1</sup> D + H <sub>2</sub> O => 2 HO                                              | 2.2E-10  | 0.   | 0.                    | Sander et al. [2000]   |
| O <sup>1</sup> D + M => O <sup>3</sup> P + M                                             | 2.09E-11 | 0.   | -96                   | Carter [2000] (1)      |
| O <sub>3</sub> + NO => NO <sub>2</sub>                                                   | 3.0E-12  | 0.   | 1500                  | Sander et al. [2000]   |
| O <sub>3</sub> + NO <sub>2</sub> => NO <sub>3</sub>                                      | 1.2E-13  | 0.   | 2450                  | De More et al. [1997]  |
| NO + NO <sub>3</sub> => 2 NO <sub>2</sub>                                                | 1.5E-11  | 0.   | -170                  | De More et al. [1997]  |
| NO + NO + M => 2 NO <sub>2</sub>                                                         | 3.30E-39 | 0.   | -530                  | Atkinson et al. [1997] |
| NO <sub>2</sub> + NO <sub>3</sub> => NO + NO <sub>2</sub>                                | 4.50E-14 | 0.   | 1260                  | De More et al. [1997]  |
| HO + HNO <sub>2</sub> => NO <sub>2</sub>                                                 | 1.8E-11  | 0.   | 390                   | De More et al. [1997]  |
| HO + NO <sub>3</sub> => HO <sub>2</sub> + NO <sub>2</sub>                                | 2.0E-11  | 0.   | 0.                    | Atkinson et al. [1997] |
| HO + CO => HO <sub>2</sub> + CO <sub>2</sub>                                             | 1.50E-13 | 0.   | 0.                    | De More et al. [1997]  |
| HO + CO + M => HO <sub>2</sub> + CO <sub>2</sub>                                         | 3.66E-33 | 0.   | 0.                    | De More et al. [1997]  |
| HO + O <sub>3</sub> => HO <sub>2</sub>                                                   | 1.5E-12  | 0.   | 880                   | Sander et al. [2000]   |
| HO <sub>2</sub> + NO => HO + NO <sub>2</sub>                                             | 3.7E-12  | 0.   | -240                  | Atkinson et al. [1997] |
| HNO <sub>4</sub> + HO => NO <sub>2</sub>                                                 | 1.3E-12  | 0.   | -380                  | De More et al. [1997]  |
| HO <sub>2</sub> + O <sub>3</sub> => HO                                                   | 2.0E-14  | 0.   | 680                   | Sander et al. [2000]   |
| NO <sub>3</sub> + HO <sub>2</sub> => 0.8 HO + 0.8 NO <sub>2</sub> + 0.2 HNO <sub>3</sub> | 3.5E-12  | 0.   | 0                     | De More et al. [1997]  |
| NO <sub>3</sub> + NO <sub>3</sub> => 2 NO <sub>2</sub>                                   | 8.5E-13  | 0.   | 2450                  | De More et al. [1997]  |
| H <sub>2</sub> O <sub>2</sub> + HO => HO <sub>2</sub>                                    | 2.9E-12  | 0.   | 160                   | De More et al. [1997]  |
| HO + HO <sub>2</sub> => H <sub>2</sub> O + O <sub>2</sub>                                | 4.80E-11 | 0.   | -250                  | Sander et al. [2000]   |
| HO + H <sub>2</sub> => HO <sub>2</sub>                                                   | 5.5E-12  | 0.   | 2000                  | De More et al. [1997]  |

(a) in molecule<sup>-1</sup>.cm<sup>3</sup>.s<sup>-1</sup>

(b) in K

(1) based on Atkinson et al. [1997] data assuming 20.9% of O<sub>2</sub> and 79.1% of N<sub>2</sub>

Table A.2: *Photolysis reactions for inorganic species - Except mentionned, spectra and quantum yields are from SAPRC99 Carter [2000]*

| Photolysis reactions                                                                                   | Reference           |
|--------------------------------------------------------------------------------------------------------|---------------------|
| O <sub>3</sub> + hν => O <sup>3</sup> P                                                                | Stutz et al. [2000] |
| O <sub>3</sub> + hν => O <sup>1</sup> D                                                                |                     |
| O <sub>2</sub> + hν => NO + O <sub>3</sub>                                                             |                     |
| NO <sub>3</sub> + hν => NO                                                                             |                     |
| NO <sub>3</sub> + hν => NO <sub>2</sub> + O <sub>3</sub>                                               |                     |
| HNO <sub>2</sub> + hν => HO + NO                                                                       |                     |
| HNO <sub>3</sub> + hν => HO + NO <sub>2</sub>                                                          |                     |
| HNO <sub>4</sub> + hν => 0.61 HO <sub>2</sub> + 0.61 NO <sub>2</sub> + 0.39 HO + 0.39 HNO <sub>3</sub> |                     |
| H <sub>2</sub> O <sub>2</sub> + hν => 2 HO                                                             |                     |

Table A.3: *Fall-off reactions for inorganic species*

| Fall-off reactions*                                                                   | Fc     | References             |
|---------------------------------------------------------------------------------------|--------|------------------------|
| $k_0^{300}$ n      E/R<br>$k_\infty^{300}$ n      E/R                                 |        |                        |
| $O^3P + NO (+M) \Rightarrow NO_2 (+M)$<br>9.0E-32 1.5 0.<br>3.0E-11 0. 0.             | Fc=0.6 | Sander et al. [2000]   |
| $O^3P + NO_2 (+M) \Rightarrow NO_3 (+M)$<br>9.0E-32 2. 0.<br>2.2E-11 0. 0.            | Fc=0.6 | De More et al. [1997]  |
| $NO_2 + NO_3 (+M) \Rightarrow N_2O_5 (+M)$<br>2.0E-30 4.4 0.<br>1.4E-12 0.7 0.        | Fc=0.6 | Sander et al. [2000]   |
| $N_2O_5 (+M) \Rightarrow NO_2 + NO_3 (+M)$<br>6.67E-04 4.4 10991<br>4.67E14 0.7 10991 | Fc=0.6 | Sander et al. [2000]   |
| $HO + NO (+M) \Rightarrow HNO_2 (+M)$<br>7.00E-31 2.6 0.<br>3.60E-11 0.1 0.           | Fc=0.6 | De More et al. [1997]  |
| $HO + NO_2 (+M) \Rightarrow HNO_3 (+M)$<br>3.0E-30 3.0 0.<br>3.6E-11 0.0 0.           | Fc=0.4 | Troe [2001]            |
| $HO_2 + NO_2 (+M) \Rightarrow HNO_4 (+M)$<br>1.80E-31 3.2 0.<br>4.70E-12 0. 0.        | Fc=0.6 | Atkinson et al. [1997] |
| $HNO_4 (+M) \Rightarrow HO_2 + NO_2 (+M)$<br>5.0E-6 0. 10000<br>2.61E15 0. 10900      | Fc=0.6 | Atkinson et al. [1997] |
| $HO + SO_2 (+M) \Rightarrow HO_2 + SULF (+M)$<br>3.0E-31 3.3 0.<br>1.5E-12 0. 0.      | Fc=0.6 | De More et al. [1997]  |

\* Parameters being used with the equation:

$$k = \frac{k_0[M]}{(1 + \frac{k_0[M]}{k_\infty})} \times Fc^{(1/[1 + \log(\frac{k_0[M]}{k_\infty})]^2)}$$

$$\text{with } k_0 = k_0^{300} \times (T/300)^{-n} \exp(-E/RT) \quad \text{and} \quad k_\infty = k_\infty^{300} \times (T/300)^{-m} \exp(-E/RT)$$

Table A.4: *Particular cases*

|                                                                                   |                                                                                                          |                       |
|-----------------------------------------------------------------------------------|----------------------------------------------------------------------------------------------------------|-----------------------|
| $\text{HO}_2 + \text{HO}_2 \Rightarrow \text{H}_2\text{O}_2$                      | $k = 2.3\text{E-}13 \exp(600/T)$                                                                         | De More et al. [1997] |
| $\text{HO}_2 + \text{HO}_2 + \text{M} \Rightarrow \text{H}_2\text{O}_2$           | $k = 1.7\text{E-}33 \exp(1000/T)$                                                                        | De More et al. [1997] |
| $\text{HO}_2 + \text{HO}_2 + \text{H}_2\text{O} \Rightarrow \text{H}_2\text{O}_2$ | $k = k_1 + k_2[\text{M}]$<br>$k_1 = 3.2\text{E-}34 \exp(2800/T)$<br>$k_2 = 2.38\text{E-}54 \exp(3200/T)$ | De More et al. [1997] |
| $\text{HO} + \text{HNO}_3 \Rightarrow \text{NO}_3$                                | $k = k_0 + k_3[\text{M}]/(1 + k_3[\text{M}]/k_2)$                                                        | Sander et al. [2000]  |
|                                                                                   | $k_0 = 2.4\text{E-}14 \exp(460/T)$                                                                       |                       |
|                                                                                   | $k_2 = 2.7\text{E-}17 \exp(2199/T)$                                                                      |                       |
|                                                                                   | $k_3 = 6.5\text{E-}34 \exp(1335/T)$                                                                      |                       |

## Organic C1 reactions

Table A.5: *Reactions for one carbon species - Kinetic rates on the form  $k=A.T^n.exp(-E_a/RT)$*

| Bimolecular reactions                                                                                      | A (a)    | n  | E <sub>a</sub> /R (b) | References and notes       |
|------------------------------------------------------------------------------------------------------------|----------|----|-----------------------|----------------------------|
| CH <sub>4</sub> + HO => CH <sub>3</sub> O <sub>2</sub>                                                     | 2.15E-12 | 0. | 1735                  | Atkinson et al. [1999]     |
| CH <sub>3</sub> O <sub>2</sub> + CH <sub>3</sub> O <sub>2</sub> => CH <sub>3</sub> OH + CH <sub>2</sub> O  | 6.0E-14  | 0. | -390                  | Tyndall et al. [2001]      |
| CH <sub>3</sub> O <sub>2</sub> + CH <sub>3</sub> O <sub>2</sub> => 2 CH <sub>2</sub> O + 2 HO <sub>2</sub> | 3.5E-14  | 0. | -390                  | Tyndall et al. [2001] (1)  |
| CH <sub>3</sub> O <sub>2</sub> + NO => CH <sub>2</sub> O + HO <sub>2</sub> + NO <sub>2</sub>               | 2.8E-12  | 0. | -300                  | Tyndall et al. [2001] (1)  |
| CH <sub>3</sub> O <sub>2</sub> + NO <sub>3</sub> => CH <sub>2</sub> O + HO <sub>2</sub> + NO <sub>2</sub>  | 1.3E-12  | 0. | 0.                    | Atkinson et al. [1999]     |
| CH <sub>3</sub> O <sub>2</sub> + HO <sub>2</sub> => CH <sub>3</sub> OOH                                    | 4.1E-13  | 0. | -750                  | Tyndall et al. [2001]      |
| CH <sub>2</sub> O + HO => CO + HO <sub>2</sub>                                                             | 8.6E-12  | 0. | -20                   | Atkinson et al. [1999]     |
| CH <sub>2</sub> O + NO <sub>3</sub> => HNO <sub>3</sub> + CO + HO <sub>2</sub>                             | 5.8E-16  | 0. | 0.                    |                            |
| CH <sub>3</sub> OOH + HO => HO + CH <sub>2</sub> O                                                         | 1.0E-12  | 0. | -190                  | Atkinson et al. [1999] (2) |
| CH <sub>3</sub> OOH + HO => CH <sub>3</sub> O <sub>2</sub>                                                 | 1.9E-12  | 0. | -190                  | Atkinson et al. [1999]     |
| HCOOH + HO => HO <sub>2</sub> + CO <sub>2</sub>                                                            | 4.5E-13  | 0. | 0.                    | Atkinson et al. [1999]     |
| CH <sub>3</sub> OH + HO => CH <sub>2</sub> O + HO <sub>2</sub>                                             | 3.1E-12  | 0. | 360                   | Atkinson et al. [1999] (3) |
| CH <sub>3</sub> OH + NO <sub>3</sub> => CH <sub>2</sub> O + HO <sub>2</sub> + HNO <sub>3</sub>             | 9.4E-13  | 0. | 2650                  | Atkinson et al. [1999]     |

(a) in molecule<sup>-1</sup>.cm<sup>3</sup>.s<sup>-1</sup>

(b) in K

Note 1 : branching ratio=0.37 for radical propagation (recommended by Tyndall et al. [2001] at 298K)

Note 2 : considering that the only way for CH<sub>2</sub>(.)OOH is the decomposition in CH<sub>2</sub>O + HO.

Note 3 : CH<sub>2</sub>(.)OH => CH<sub>2</sub>O + HO<sub>2</sub>

Table A.6: *Photolysis reactions for one carbon species*

| Photolysis reactions                                                 |
|----------------------------------------------------------------------|
| HCHO + hν => CO + 2 HO <sub>2</sub>                                  |
| HCHO + hν => H <sub>2</sub> + CO                                     |
| CH <sub>3</sub> OOH + hν => CH <sub>2</sub> O + HO <sub>2</sub> + HO |



# Reactions for organic species

| thermal reactions   |                                                                                                                                                                                                                                                                                                        | A         | n    | Ea/R  |
|---------------------|--------------------------------------------------------------------------------------------------------------------------------------------------------------------------------------------------------------------------------------------------------------------------------------------------------|-----------|------|-------|
| HO + NITR01         | → 0.047 HO2 + 0.338 <1RO2_7> + 0.227 <1RO2_2> + 0.003 <1N03001#2> + 0.197 <2RO2_72> + 0.034 <1NITR01#2> + 0.045 <1NITR01#7> + 0.009 <1NONO2_7> + 0.109 <1_2NO2_2> + 0.003 <2_2NO2_72> + 0.003 CH2O + 0.196 D02000 + 0.147 D03000 + 0.460 K04000 + 0.511 N03001 + 0.070 XN2 + 0.043 OPEALC + 0.191 HNO3 | 0.100E-11 | 0.0  | 0     |
| HO + NITR02         | → 0.047 HO2 + 0.338 <1RO2_7> + 0.227 <1RO2_2> + 0.003 <1N03001#2> + 0.197 <2RO2_72> + 0.034 <1NITR01#2> + 0.045 <1NITR01#7> + 0.009 <1NONO2_7> + 0.109 <1_2NO2_2> + 0.003 <2_2NO2_72> + 0.003 CH2O + 0.196 D02000 + 0.147 D03000 + 0.460 K04000 + 0.511 N03001 + 0.070 XN2 + 0.043 OPEALC + 0.191 HNO3 | 0.250E-10 | 0.0  | 0     |
| HO + HP1NITR02#2    | → 0.330 HO + 0.670 <1NITR02#2>                                                                                                                                                                                                                                                                         | 0.293E-11 | 0.0  | -190  |
| HO + OPEALC         | → HO2                                                                                                                                                                                                                                                                                                  | 0.103E-10 | 0.0  | 0     |
| HO + XN2            | → NO2                                                                                                                                                                                                                                                                                                  | 0.118E-12 | 0.0  | 0     |
| HO2 + <1RO2_A>      | → 0.200 O3 + 0.200 CA2NONO2AC + 0.800 PA2NONO2AC                                                                                                                                                                                                                                                       | 0.640E-12 | 0.0  | -925  |
| NO + <1RO2_A>       | → HO2 + NO2                                                                                                                                                                                                                                                                                            | 0.810E-11 | 0.0  | -270  |
| NO2 + <1RO2_A>      | → PAN2NONO2AC                                                                                                                                                                                                                                                                                          | 0.330E-08 | -1.0 | 0     |
| NO3 + <1RO2_A>      | → HO2 + NO2                                                                                                                                                                                                                                                                                            | 0.500E-11 | 0.0  | 0     |
| <1RO2_A> + CH3O2    | → 1.380 HO2 + CH2O                                                                                                                                                                                                                                                                                     | 0.100E-10 | 0.0  | 0     |
| NO + <1RO2_2>       | → HO2 + NO2                                                                                                                                                                                                                                                                                            | 0.270E-11 | 0.0  | -360  |
| HO2 + <1RO2_2>      | → HP2RO2_22                                                                                                                                                                                                                                                                                            | 0.196E-12 | 0.0  | -1250 |
| NO3 + <1RO2_2>      | → HO2 + NO2                                                                                                                                                                                                                                                                                            | 0.230E-11 | 0.0  | 0     |
| <1RO2_2> + CH3O2    | → 0.880 HO2 + 0.720 CH2O + 0.280 CH3OH                                                                                                                                                                                                                                                                 | 0.544E-13 | 0.0  | -945  |
| NO + <1RO2_7>       | → HO2 + NO2                                                                                                                                                                                                                                                                                            | 0.270E-11 | 0.0  | -360  |
| HO2 + <1RO2_7>      | → HP2RO2_22                                                                                                                                                                                                                                                                                            | 0.196E-12 | 0.0  | -1250 |
| NO3 + <1RO2_7>      | → HO2 + NO2                                                                                                                                                                                                                                                                                            | 0.230E-11 | 0.0  | 0     |
| HO2 + <1NONO2_A>    | → 0.200 O3 + 0.200 CA2NONO2AC + 0.800 PA2NONO2AC                                                                                                                                                                                                                                                       | 0.640E-12 | 0.0  | -925  |
| NO + <1NONO2_A>     | → NO2                                                                                                                                                                                                                                                                                                  | 0.810E-11 | 0.0  | -270  |
| NO2 + <1NONO2_A>    | → PAN2NONO2AC                                                                                                                                                                                                                                                                                          | 0.330E-08 | -1.0 | 0     |
| NO3 + <1NONO2_A>    | → NO2                                                                                                                                                                                                                                                                                                  | 0.500E-11 | 0.0  | 0     |
| <1NONO2_A> + CH3O2  | → 0.690 HO2 + CH2O                                                                                                                                                                                                                                                                                     | 0.100E-10 | 0.0  | 0     |
| NO + <1NONO2_2>     | → NO2                                                                                                                                                                                                                                                                                                  | 0.270E-11 | 0.0  | -360  |
| HO2 + <1NONO2_2>    | → HP2RO2_22                                                                                                                                                                                                                                                                                            | 0.196E-12 | 0.0  | -1250 |
| NO3 + <1NONO2_2>    | → NO2                                                                                                                                                                                                                                                                                                  | 0.230E-11 | 0.0  | 0     |
| <1NONO2_2> + CH3O2  | → 0.440 HO2 + 0.720 CH2O + 0.280 CH3OH                                                                                                                                                                                                                                                                 | 0.544E-13 | 0.0  | -945  |
| NO + <1NONO2_7>     | → NO2                                                                                                                                                                                                                                                                                                  | 0.270E-11 | 0.0  | -360  |
| HO2 + <1NONO2_7>    | → HP2RO2_22                                                                                                                                                                                                                                                                                            | 0.196E-12 | 0.0  | -1250 |
| NO3 + <1NONO2_7>    | → NO2                                                                                                                                                                                                                                                                                                  | 0.230E-11 | 0.0  | 0     |
| NO + <1OHRO2_2>     | → HO + NO2                                                                                                                                                                                                                                                                                             | 0.270E-11 | 0.0  | -360  |
| HO2 + <1OHRO2_2>    | → HP2RO2_22                                                                                                                                                                                                                                                                                            | 0.196E-12 | 0.0  | -1250 |
| NO3 + <1OHRO2_2>    | → HO + NO2                                                                                                                                                                                                                                                                                             | 0.230E-11 | 0.0  | 0     |
| <1OHRO2_2> + CH3O2  | → 0.440 HO + 0.440 HO2 + 0.720 CH2O + 0.280 CH3OH                                                                                                                                                                                                                                                      | 0.544E-13 | 0.0  | -945  |
| HO2 + <1_2NO2_A>    | → 0.200 O3 + 0.200 CA2NONO2AC + 0.800 PA2NONO2AC                                                                                                                                                                                                                                                       | 0.640E-12 | 0.0  | -925  |
| NO + <1_2NO2_A>     | → 2.000 NO2                                                                                                                                                                                                                                                                                            | 0.810E-11 | 0.0  | -270  |
| NO2 + <1_2NO2_A>    | → PAN2NONO2AC                                                                                                                                                                                                                                                                                          | 0.330E-08 | -1.0 | 0     |
| NO3 + <1_2NO2_A>    | → 2.000 NO2                                                                                                                                                                                                                                                                                            | 0.500E-11 | 0.0  | 0     |
| <1_2NO2_A> + CH3O2  | → 0.690 HO2 + 0.690 NO2 + CH2O + 0.310 XN                                                                                                                                                                                                                                                              | 0.100E-10 | 0.0  | 0     |
| NO + <1_2NO2_2>     | → 2.000 NO2                                                                                                                                                                                                                                                                                            | 0.270E-11 | 0.0  | -360  |
| HO2 + <1_2NO2_2>    | → HP2RO2_22                                                                                                                                                                                                                                                                                            | 0.196E-12 | 0.0  | -1250 |
| NO3 + <1_2NO2_2>    | → 2.000 NO2                                                                                                                                                                                                                                                                                            | 0.230E-11 | 0.0  | 0     |
| <1_2NO2_2> + CH3O2  | → 0.440 HO2 + 0.440 NO2 + 0.720 CH2O + 0.280 CH3OH + 0.560 XN                                                                                                                                                                                                                                          | 0.544E-13 | 0.0  | -945  |
| NO + <1_2NO2_7>     | → 2.000 NO2                                                                                                                                                                                                                                                                                            | 0.270E-11 | 0.0  | -360  |
| HO2 + <1_2NO2_7>    | → HP2RO2_22                                                                                                                                                                                                                                                                                            | 0.196E-12 | 0.0  | -1250 |
| NO3 + <1_2NO2_7>    | → 2.000 NO2                                                                                                                                                                                                                                                                                            | 0.230E-11 | 0.0  | 0     |
| HO + CA2NONO2AC     | → <2NONO2_AC>                                                                                                                                                                                                                                                                                          | 0.698E-12 | 0.0  | 0     |
| HO + PA2NONO2AC     | → <2NONO2_AC>                                                                                                                                                                                                                                                                                          | 0.195E-11 | 0.0  | -190  |
| HO2 + <2NONO2_AC>   | → 0.200 O3 + 0.200 CA2NONO2AC + 0.800 PA2NONO2AC                                                                                                                                                                                                                                                       | 0.640E-12 | 0.0  | -925  |
| NO + <2NONO2_AC>    | → NO2 + CH3O2                                                                                                                                                                                                                                                                                          | 0.810E-11 | 0.0  | -270  |
| NO3 + <2NONO2_AC>   | → NO2 + CH3O2                                                                                                                                                                                                                                                                                          | 0.500E-11 | 0.0  | 0     |
| <2NONO2_AC> + CH3O2 | → 0.690 HO2 + CH2O + 0.690 CH3O2                                                                                                                                                                                                                                                                       | 0.100E-10 | 0.0  | 0     |
| HO + HP1NITR02#2    | → <1NITR02#2>                                                                                                                                                                                                                                                                                          | 0.190E-11 | 0.0  | -190  |
| HO + HP1NITR02#2    | → HO                                                                                                                                                                                                                                                                                                   | 0.132E-10 | 0.0  | 0     |
| HO + HP2RO2_22      | → <2RO2_22>                                                                                                                                                                                                                                                                                            | 0.190E-11 | 0.0  | -190  |
| HO + HP2RO2_22      | → HO                                                                                                                                                                                                                                                                                                   | 0.132E-10 | 0.0  | 0     |
| NO + <1NITR02#7>    | → NITR02                                                                                                                                                                                                                                                                                               | 0.270E-11 | 0.0  | -360  |

|                     |   |                                                        |           |      |       |
|---------------------|---|--------------------------------------------------------|-----------|------|-------|
| HO2 + <1NITR02#7>   | → | HP1NITR02#2                                            | 0.196E-12 | 0.0  | -1250 |
| NO3 + <1NITR02#7>   | → | HO2 + NO2                                              | 0.230E-11 | 0.0  | 0     |
| NO + <1N03001#2>    | → | N03001                                                 | 0.270E-11 | 0.0  | -360  |
| HO2 + <1N03001#2>   | → | 3.000 XC + HP1NITR02#2                                 | 0.196E-12 | 0.0  | -1250 |
| NO3 + <1N03001#2>   | → | HO2 + NO2 + 3.000 XC                                   | 0.230E-11 | 0.0  | 0     |
| <1N03001#2> + CH3O2 | → | 0.880 HO2 + 3.000 XC + 0.720 CH2O + 0.280 CH3OH        | 0.544E-13 | 0.0  | -945  |
| NO + <1N03001#7>    | → | N03001                                                 | 0.270E-11 | 0.0  | -360  |
| HO2 + <1N03001#7>   | → | 3.000 XC + HP1NITR02#2                                 | 0.196E-12 | 0.0  | -1250 |
| NO3 + <1N03001#7>   | → | HO2 + NO2 + 3.000 XC                                   | 0.230E-11 | 0.0  | 0     |
| NO + <1NITR01#2>    | → | NITR01                                                 | 0.270E-11 | 0.0  | -360  |
| HO2 + <1NITR01#2>   | → | HP1NITR02#2                                            | 0.196E-12 | 0.0  | -1250 |
| NO3 + <1NITR01#2>   | → | HO2 + NO2                                              | 0.230E-11 | 0.0  | 0     |
| <1NITR01#2> + CH3O2 | → | 0.880 HO2 + 0.720 CH2O + 0.280 CH3OH                   | 0.544E-13 | 0.0  | -945  |
| NO + <1NITR01#7>    | → | NITR01                                                 | 0.270E-11 | 0.0  | -360  |
| HO2 + <1NITR01#7>   | → | HP1NITR02#2                                            | 0.196E-12 | 0.0  | -1250 |
| NO3 + <1NITR01#7>   | → | HO2 + NO2                                              | 0.230E-11 | 0.0  | 0     |
| NO + <1NITR02#2>    | → | NITR02                                                 | 0.270E-11 | 0.0  | -360  |
| HO2 + <1NITR02#2>   | → | HP1NITR02#2                                            | 0.196E-12 | 0.0  | -1250 |
| NO3 + <1NITR02#2>   | → | HO2 + NO2                                              | 0.230E-11 | 0.0  | 0     |
| <1NITR02#2> + CH3O2 | → | 0.880 HO2 + 0.720 CH2O + 0.280 CH3OH                   | 0.544E-13 | 0.0  | -945  |
| HO2 + <2RO2_A2>     | → | 0.200 O3 + 0.200 CA2NONO2AC + 0.800 PA2NONO2AC         | 0.640E-12 | 0.0  | -945  |
| NO + <2RO2_A2>      | → | NO2 + <1RO2_2>                                         | 0.810E-11 | 0.0  | -270  |
| NO2 + <2RO2_A2>     | → | PAN2NONO2AC                                            | 0.330E-08 | -1.0 | 0     |
| NO3 + <2RO2_A2>     | → | NO2 + <1RO2_2>                                         | 0.500E-11 | 0.0  | 0     |
| <2RO2_A2> + CH3O2   | → | 0.690 HO2 + 0.690 <1RO2_2> + CH2O                      | 0.100E-10 | 0.0  | 0     |
| NO + <2RO2_2A>      | → | NO2 + <1RO2_A>                                         | 0.270E-11 | 0.0  | -360  |
| HO2 + <2RO2_2A>     | → | HP2RO2_22                                              | 0.196E-12 | 0.0  | -1250 |
| NO3 + <2RO2_2A>     | → | NO2 + <1RO2_A>                                         | 0.230E-11 | 0.0  | 0     |
| <2RO2_2A> + CH3O2   | → | 0.440 HO2 + 0.440 <1RO2_A> + 0.720 CH2O + 0.280 CH3OH  | 0.544E-13 | 0.0  | -955  |
| NO + <2RO2_22>      | → | NO2 + <1RO2_2>                                         | 0.270E-11 | 0.0  | -360  |
| HO2 + <2RO2_22>     | → | HP2RO2_22                                              | 0.196E-12 | 0.0  | -1250 |
| NO3 + <2RO2_22>     | → | NO2 + <1RO2_2>                                         | 0.230E-11 | 0.0  | 0     |
| <2RO2_22> + CH3O2   | → | 0.440 HO2 + 0.440 <1RO2_2> + 0.720 CH2O + 0.280 CH3OH  | 0.544E-13 | 0.0  | -955  |
| NO + <2RO2_72>      | → | NO2 + <1RO2_2>                                         | 0.270E-11 | 0.0  | -360  |
| HO2 + <2RO2_72>     | → | HP2RO2_22                                              | 0.196E-12 | 0.0  | -1250 |
| NO3 + <2RO2_72>     | → | NO2 + <1RO2_2>                                         | 0.230E-11 | 0.0  | 0     |
| NO + <2RO2_27>      | → | NO2 + <1RO2_7>                                         | 0.270E-11 | 0.0  | -360  |
| HO2 + <2RO2_27>     | → | HP2RO2_22                                              | 0.196E-12 | 0.0  | -1250 |
| NO3 + <2RO2_27>     | → | NO2 + <1RO2_7>                                         | 0.230E-11 | 0.0  | 0     |
| <2RO2_27> + CH3O2   | → | 0.440 HO2 + 0.440 <1RO2_7> + 0.720 CH2O + 0.280 CH3OH  | 0.544E-13 | 0.0  | -955  |
| NO + <2RO2_77>      | → | NO2 + <1RO2_7>                                         | 0.270E-11 | 0.0  | -360  |
| HO2 + <2RO2_77>     | → | HP2RO2_22                                              | 0.196E-12 | 0.0  | -1250 |
| NO3 + <2RO2_77>     | → | NO2 + <1RO2_7>                                         | 0.230E-11 | 0.0  | 0     |
| NO + <3RO2_727>     | → | NO2 + <2RO2_27>                                        | 0.270E-11 | 0.0  | -360  |
| HO2 + <3RO2_727>    | → | HP2RO2_22                                              | 0.196E-12 | 0.0  | -1250 |
| NO3 + <3RO2_727>    | → | NO2 + <2RO2_27>                                        | 0.230E-11 | 0.0  | 0     |
| NO + <3RO2_772>     | → | NO2 + <2RO2_72>                                        | 0.270E-11 | 0.0  | -360  |
| HO2 + <3RO2_772>    | → | HP2RO2_22                                              | 0.196E-12 | 0.0  | -1250 |
| NO3 + <3RO2_772>    | → | NO2 + <2RO2_72>                                        | 0.230E-11 | 0.0  | 0     |
| NO + <3RO2_722>     | → | NO2 + <2RO2_22>                                        | 0.270E-11 | 0.0  | -360  |
| HO2 + <3RO2_722>    | → | HP2RO2_22                                              | 0.196E-12 | 0.0  | -1250 |
| NO3 + <3RO2_722>    | → | NO2 + <2RO2_22>                                        | 0.230E-11 | 0.0  | 0     |
| NO + <3RO2_2A2>     | → | NO2 + <2RO2_A2>                                        | 0.270E-11 | 0.0  | -360  |
| HO2 + <3RO2_2A2>    | → | HP2RO2_22                                              | 0.196E-12 | 0.0  | -1250 |
| NO3 + <3RO2_2A2>    | → | NO2 + <2RO2_A2>                                        | 0.230E-11 | 0.0  | 0     |
| <3RO2_2A2> + CH3O2  | → | 0.440 HO2 + 0.440 <2RO2_A2> + 0.720 CH2O + 0.280 CH3OH | 0.544E-13 | 0.0  | -955  |
| HO2 + <2RO2_A7>     | → | 0.200 O3 + 0.200 CA2NONO2AC + 0.800 PA2NONO2AC         | 0.640E-12 | 0.0  | -945  |
| NO + <2RO2_A7>      | → | NO2 + <1RO2_7>                                         | 0.810E-11 | 0.0  | -270  |
| NO2 + <2RO2_A7>     | → | PAN2NONO2AC                                            | 0.330E-08 | -1.0 | 0     |
| NO3 + <2RO2_A7>     | → | NO2 + <1RO2_7>                                         | 0.500E-11 | 0.0  | 0     |
| <2RO2_A7> + CH3O2   | → | 0.690 HO2 + 0.690 <1RO2_7> + CH2O                      | 0.100E-10 | 0.0  | 0     |
| HO2 + <2OHRO2_A2>   | → | 0.200 O3 + 0.200 CA2NONO2AC + 0.800 PA2NONO2AC         | 0.640E-12 | 0.0  | -925  |
| NO + <2OHRO2_A2>    | → | NO2 + <1OHRO2_2>                                       | 0.810E-11 | 0.0  | -270  |
| NO2 + <2OHRO2_A2>   | → | PAN2NONO2AC                                            | 0.330E-08 | -1.0 | 0     |
| NO3 + <2OHRO2_A2>   | → | NO2 + <1OHRO2_2>                                       | 0.500E-11 | 0.0  | 0     |
| <2OHRO2_A2> + CH3O2 | → | 0.690 HO2 + 0.690 <1OHRO2_2> + CH2O                    | 0.100E-10 | 0.0  | 0     |
| NO + <2NONO2_7C>    | → | NO2 + CH3O2                                            | 0.270E-11 | 0.0  | -360  |
| HO2 + <2NONO2_7C>   | → | HP2RO2_22                                              | 0.196E-12 | 0.0  | -1250 |
| NO3 + <2NONO2_7C>   | → | NO2 + CH3O2                                            | 0.230E-11 | 0.0  | 0     |

|                      |   |                                                                                                                                                                                                                                                                                                               |           |      |       |
|----------------------|---|---------------------------------------------------------------------------------------------------------------------------------------------------------------------------------------------------------------------------------------------------------------------------------------------------------------|-----------|------|-------|
| NO + <3NONO2_2AC>    | → | NO2 + <2NONO2_AC>                                                                                                                                                                                                                                                                                             | 0.270E-11 | 0.0  | -360  |
| HO2 + <3NONO2_2AC>   | → | HP2RO2_22                                                                                                                                                                                                                                                                                                     | 0.196E-12 | 0.0  | -1250 |
| NO3 + <3NONO2_2AC>   | → | NO2 + <2NONO2_AC>                                                                                                                                                                                                                                                                                             | 0.230E-11 | 0.0  | 0     |
| <3NONO2_2AC> + CH3O2 | → | 0.440 HO2 + 0.440 <2NONO2_AC> + 0.720 CH2O + 0.280 CH3OH                                                                                                                                                                                                                                                      | 0.544E-13 | 0.0  | -945  |
| NO + <2NONO2_2C>     | → | NO2 + CH3O2                                                                                                                                                                                                                                                                                                   | 0.270E-11 | 0.0  | -360  |
| HO2 + <2NONO2_2C>    | → | HP2RO2_22                                                                                                                                                                                                                                                                                                     | 0.196E-12 | 0.0  | -1250 |
| NO3 + <2NONO2_2C>    | → | NO2 + CH3O2                                                                                                                                                                                                                                                                                                   | 0.230E-11 | 0.0  | 0     |
| <2NONO2_2C> + CH3O2  | → | 0.440 HO2 + 0.720 CH2O + 0.280 CH3OH + 0.440 CH3O2                                                                                                                                                                                                                                                            | 0.544E-13 | 0.0  | -945  |
| HO2 + <3NONO2_AAC>   | → | 0.200 O3 + 0.200 CA2NONO2AC + 0.800 PA2NONO2AC                                                                                                                                                                                                                                                                | 0.640E-12 | 0.0  | -925  |
| NO2 + <3NONO2_AAC>   | → | PAN2NONO2AC                                                                                                                                                                                                                                                                                                   | 0.330E-08 | -1.0 | 0     |
| NO + <3NONO2_AAC>    | → | NO2 + <2NONO2_AC>                                                                                                                                                                                                                                                                                             | 0.810E-11 | 0.0  | -270  |
| NO3 + <3NONO2_AAC>   | → | NO2 + <2NONO2_AC>                                                                                                                                                                                                                                                                                             | 0.500E-11 | 0.0  | 0     |
| <3NONO2_AAC> + CH3O2 | → | 0.690 HO2 + 0.690 <2NONO2_AC> + CH2O                                                                                                                                                                                                                                                                          | 0.100E-10 | 0.0  | 0     |
| NO + <2_2NO2_2A>     | → | NO2 + <1_2NO2_A>                                                                                                                                                                                                                                                                                              | 0.270E-11 | 0.0  | -360  |
| HO2 + <2_2NO2_2A>    | → | HP2RO2_22                                                                                                                                                                                                                                                                                                     | 0.196E-12 | 0.0  | -1250 |
| NO3 + <2_2NO2_2A>    | → | NO2 + <1_2NO2_A>                                                                                                                                                                                                                                                                                              | 0.230E-11 | 0.0  | 0     |
| <2_2NO2_2A> + CH3O2  | → | 0.440 HO2 + 0.440 <1_2NO2_A> + 0.720 CH2O + 0.280 CH3OH + 0.560 XN                                                                                                                                                                                                                                            | 0.544E-13 | 0.0  | -945  |
| NO + <2_2NO2_72>     | → | NO2 + <1_2NO2_2>                                                                                                                                                                                                                                                                                              | 0.270E-11 | 0.0  | -360  |
| HO2 + <2_2NO2_72>    | → | HP2RO2_22                                                                                                                                                                                                                                                                                                     | 0.196E-12 | 0.0  | -1250 |
| NO3 + <2_2NO2_72>    | → | NO2 + <1_2NO2_2>                                                                                                                                                                                                                                                                                              | 0.230E-11 | 0.0  | 0     |
| HO + LIMO            | → | 6.250 XC + 0.750 D03000 + 0.750 RO2R + 0.250 RO2N + 0.500 R2O2                                                                                                                                                                                                                                                | 0.319E-10 | 0.0  | -500  |
| O3 + LIMO            | → | 0.700 HO + 5.492 XC + 0.482 <2NONO2_AC> + 0.540 CO2 + 0.058 <2RO2_A2> + 0.058 CH2O + 0.058 D02000 + 0.482 D03000 + 0.161 RO2N + 0.539 R2O2 + 0.300 A03000                                                                                                                                                     | 0.371E-14 | 0.0  | 870   |
| NO3 + LIMO           | → | 0.750 NO2 + 6.250 XC + 0.750 D03000 + 0.250 RO2N + 0.750 R2O2 + 0.250 XN                                                                                                                                                                                                                                      | 0.122E-10 | 0.0  | 0     |
| HO + ISO             | → | 0.050 <1NITR02#7> + 0.616 <1RO2_7> + 0.309 <1RO2_2> + 0.025 <1NITR02#2> + 0.924 CH2O + 0.617 MVKET + 0.308 MEACR                                                                                                                                                                                              | 0.254E-10 | 0.0  | -410  |
| O3 + ISO             | → | 0.065 H2 + 0.310 HO + 0.060 HO2 + 0.011 XC + 0.469 CO + 0.366 CO2 + 0.011 <1N03001#2> + 0.239 <2RO2_2A> + 0.062 U03000 + 0.958 CH2O + 0.438 MVKET + 0.250 MEACR + 0.020 GLYOX + 0.185 HCOOH                                                                                                                   | 0.786E-14 | 0.0  | 1913  |
| NO3 + ISO            | → | 0.075 <1NITR02#7> + 0.740 <1_2NO2_7> + 0.185 <2NONO2_7C> + 0.740 CH2O + 0.740 MVKET + 0.075 XN2 + 0.185 NU4000                                                                                                                                                                                                | 0.303E-11 | 0.0  | 446   |
| HO + APIN            | → | 6.250 XC + 0.750 D03000 + 0.750 RO2R + 0.250 RO2N + 0.500 R2O2                                                                                                                                                                                                                                                | 0.121E-10 | 0.0  | -444  |
| O3 + APIN            | → | 0.700 HO + 3.873 XC + 0.051 CO + 0.298 CO2 + 0.298 <2RO2_A2> + 0.339 CH2O + 0.298 D02000 + 0.218 D03000 + 0.345 ACETO + 0.081 RO2R + 0.321 RO2N + 1.375 R2O2 + 0.300 A03000 + 0.002 GLYOX + 0.081 BIACE                                                                                                       | 0.101E-14 | 0.0  | 732   |
| NO3 + APIN           | → | 0.750 NO2 + 6.250 XC + 0.750 D03000 + 0.250 RO2N + 0.750 R2O2 + 0.250 XN                                                                                                                                                                                                                                      | 0.119E-11 | 0.0  | -490  |
| HO + C02000          | → | <1RO2_2> + D02000                                                                                                                                                                                                                                                                                             | 0.152E-16 | 2.0  | 498   |
| HO + C03000          | → | 0.703 <1RO2_7> + 0.246 <1RO2_2> + 0.006 <1N03001#2> + 0.044 <1N03001#7> + 0.246 D03000 + 0.703 ACETO                                                                                                                                                                                                          | 0.155E-16 | 2.0  | 61    |
| HO + C04000          | → | 0.091 XC + 0.755 <1RO2_7> + 0.031 <1RO2_2> + 0.009 <1N03001#2> + 0.082 <1N03001#7> + 0.080 <2RO2_22> + 0.043 <2RO2_72> + 0.004 <1NONO2_2> + 0.086 D02000 + 0.080 D03000 + 0.031 D04000 + 0.775 K04000 + 0.020 OPEALC                                                                                          | 0.169E-16 | 2.0  | -145  |
| HO + C04001          | → | 0.045 XC + 0.126 <1RO2_2> + 0.008 <1N03001#2> + 0.776 <2NONO2_7C> + 0.040 <1N03001#7> + 0.003 <1NONO2_2> + 0.050 <2RO2_27> + 0.053 CH2O + 0.126 D04001 + 0.825 ACETO                                                                                                                                          | 0.116E-16 | 2.0  | -225  |
| HO + C06000          | → | 0.259 XC + 0.108 <1RO2_7> + 0.286 <2RO2_72> + 0.006 <1NONO2_2> + 0.045 <2RO2_27> + 0.007 <1NITR01#2> + 0.217 <1NITR01#7> + 0.302 <2RO2_77> + 0.037 <1NITR02#2> + 0.076 <1NONO2_7> + 0.045 D03000 + 0.915 K04000 + 0.108 K06000 + 0.327 OPEALC                                                                 | 0.153E-16 | 2.0  | -414  |
| HO + C06001          | → | 0.207 XC + 0.033 <1RO2_7> + 0.001 <1RO2_2> + 0.002 <1N03001#2> + 0.012 <1N03001#7> + 0.504 <2RO2_72> + 0.045 <2RO2_27> + 0.061 <1NITR01#2> + 0.146 <1NITR01#7> + 0.193 <2RO2_77> + 0.002 <3RO2_772> + 0.002 CH2O + 0.005 D02000 + 0.624 D03000 + 0.004 D04001 + 0.269 ACETO + 0.138 K04000                    | 0.530E-11 | 0.0  | 0     |
| HO + C08000          | → | 1.233 XC + 0.105 <1NITR02#7> + 0.007 <1RO2_7> + 0.007 <2RO2_72> + 0.304 <1NITR01#7> + 0.575 <2RO2_77> + 0.002 <1NITR02#2> + 0.150 <1NONO2_7> + 0.003 C04000 + 1.164 K04000 + 0.007 K06000 + 0.582 OPEALC                                                                                                      | 0.276E-16 | 2.0  | -378  |
| HO + C08005          | → | 1.168 XC + 0.049 <1NITR02#7> + 0.015 <1RO2_7> + 0.002 <1N03001#7> + 0.095 <2RO2_72> + 0.002 <1NITR01#2> + 0.317 <1NITR01#7> + 0.472 <2RO2_77> + 0.024 <1NITR02#2> + 0.014 <3RO2_772> + 0.010 <3RO2_722> + 0.011 CH2O + 0.012 D02000 + 0.052 D03000 + 0.004 D04000 + 0.002 D04001 + 0.024 ACETO + 0.552 K04000 | 0.824E-11 | 0.0  | 0     |

|              |   |                                                                                                                                                                                                                         |           |     |      |
|--------------|---|-------------------------------------------------------------------------------------------------------------------------------------------------------------------------------------------------------------------------|-----------|-----|------|
| HO + U02000  | → | <1RO2_2> + 1.558 CH2O + 0.221 DO2000                                                                                                                                                                                    | 0.196E-11 | 0.0 | -438 |
| O3 + U02000  | → | 0.130 H2 + 0.120 HO + 0.120 HO2 + 0.500 CO + 0.130 CO2 + CH2O + 0.370 HCOOH                                                                                                                                             | 0.914E-14 | 0.0 | 2580 |
| NO3 + U02000 | → | <1RO2_2> + ND2000                                                                                                                                                                                                       | 0.488E-17 | 2.0 | 2282 |
| HO + U03000  | → | 0.975 <1RO2_2> + 0.025 <1N03001#2> + 0.970 CH2O + 0.970 D02000 + 0.005 MGLYO + 0.005 OPEALC                                                                                                                             | 0.485E-11 | 0.0 | -504 |
| O3 + U03000  | → | 0.065 H2 + 0.320 HO + 0.060 HO2 + 0.510 CO + 0.135 CO2 + 0.500 CH2O + 0.500 D02000 + 0.185 HCOOH + 0.170 A02000 + 0.070 CH4 + 0.260 CH3O2                                                                               | 0.551E-14 | 0.0 | 1878 |
| NO3 + U03000 | → | 0.975 <1RO2_2> + 0.025 <1N03001#2> + 0.025 XN2 + 0.975 NK3000                                                                                                                                                           | 0.459E-12 | 0.0 | 1156 |
| HO + U04000  | → | 0.045 XC + 0.955 <1RO2_2> + 0.045 <1N03001#2> + 0.950 CH2O + 0.950 D03000 + 0.005 K04000                                                                                                                                | 0.655E-11 | 0.0 | -467 |
| O3 + U04000  | → | 0.065 H2 + 0.290 HO + 0.060 HO2 + 0.480 CO + 0.065 CO2 + 0.230 <1RO2_2> + 0.500 CH2O + 0.230 D02000 + 0.500 D03000 + 0.270 A03000 + 0.185 HCOOH                                                                         | 0.336E-14 | 0.0 | 1744 |
| NO3 + U04000 | → | 0.045 XC + 0.925 <1RO2_2> + 0.045 <1N03001#2> + 0.030 <2RO2_22> + 0.030 D02000 + 0.231 K04000 + 0.925 N03001 + 0.045 XN2 + 0.030 ND2000                                                                                 | 0.314E-12 | 0.0 | 938  |
| HO + U04002  | → | 0.045 XC + 0.955 <1RO2_2> + 0.045 <1N03001#2> + 1.910 D02000                                                                                                                                                            | 0.101E-10 | 0.0 | -550 |
| O3 + U04002  | → | 0.520 HO + 0.520 CO + 0.140 CO2 + D02000 + 0.340 A02000 + 0.140 CH4 + 0.520 CH3O2                                                                                                                                       | 0.664E-14 | 0.0 | 1059 |
| NO3 + U04002 | → | 0.045 XC + 0.462 <1RO2_2> + 0.045 <1N03001#2> + 0.493 <1_2NO2_2> + 0.986 D02000 + 0.116 K04000 + 0.462 N03001 + 0.045 XN2                                                                                               | 0.122E-17 | 2.0 | -382 |
| HO + U05004  | → | 0.858 <1RO2_7> + 0.067 <1RO2_2> + 0.005 <1NITR01#2> + 0.070 <1NITR01#7> + 0.925 CH2O + 0.925 K04000                                                                                                                     | 0.610E-10 | 0.0 | 0    |
| O3 + U05004  | → | 0.045 H2 + 0.692 HO + 0.042 HO2 + 0.029 XC + 0.175 CO + 0.666 CO2 + 0.029 <1N03001#2> + 0.542 <3NONO2_2AC> + 0.079 <3RO2_2A2> + 0.729 CH2O + 0.621 D02000 + 0.350 K04000 + 0.130 HCOOH                                  | 0.160E-16 | 0.0 | 0    |
| NO3 + U05004 | → | 0.925 <2RO2_72> + 0.075 <1NITR01#7> + 0.925 D02000 + 0.075 XN2 + 0.925 NK3000                                                                                                                                           | 0.332E-12 | 0.0 | 0    |
| HO + U05003  | → | 0.599 <1RO2_7> + 0.326 <1RO2_2> + 0.026 <1NITR01#2> + 0.049 <1NITR01#7> + 0.925 D02000 + 0.925 ACETO                                                                                                                    | 0.192E-10 | 0.0 | -450 |
| O3 + U05003  | → | 0.856 HO + 0.156 CO + 0.725 CO2 + 0.018 <1N03001#2> + 0.683 <3NONO2_2AC> + 0.683 CH2O + 0.700 D02000 + 0.300 ACETO + 0.102 A02000 + 0.042 CH4 + 0.156 CH3O2                                                             | 0.651E-14 | 0.0 | 829  |
| NO3 + U05003 | → | 0.925 <1_2NO2_7> + 0.075 <1NITR01#7> + 0.925 D02000 + 0.925 ACETO + 0.075 XN2                                                                                                                                           | 0.937E-11 | 0.0 | 0    |
| HO + BUTYN   | → | 0.670 HO + 0.330 <2NONO2_AC> + 0.330 CO2 + 0.670 BIACE + 0.330 A02000                                                                                                                                                   | 0.100E-10 | 0.0 | -300 |
| O3 + BUTYN   | → | HO + -0.080 XC + 0.961 CO2 + 0.961 <2RO2_A2> + 0.961 CH2O + 0.961 D02000 + 0.039 RO2N + 0.961 R2O2                                                                                                                      | 0.100E-13 | 0.0 | 3915 |
| HO + ACTYN   | → | 0.603 HO + 0.297 HO2 + 0.393 CO + 0.096 CH2O + 0.100 RO2R + 0.607 GLYOX + 0.297 HCOOH                                                                                                                                   | 0.940E-11 | 0.0 | 700  |
| HO + ACTYN   | → | 0.500 HO + 1.500 HO2 + 1.500 CO + 0.500 CO2                                                                                                                                                                             | 0.200E-13 | 0.0 | 4398 |
| HO + BENZ    | → | 0.236 HO2 + 1.114 XC + 0.764 RO2R + 0.207 GLYOX + 0.236 PHEN + 0.764 DCB1                                                                                                                                               | 0.247E-11 | 0.0 | 207  |
| HO + TOL     | → | 0.234 HO2 + 1.177 XC + 0.085 BALD + 0.758 RO2R + 0.008 RO2N + 0.116 GLYOX + 0.135 MGLYO + 0.460 DCB1 + 0.234 CRES + 0.156 DCB2 + 0.057 DCB3                                                                             | 0.181E-11 | 0.0 | -355 |
| HO + ETBNZ   | → | 0.190 HO2 + 2.340 XC + 0.786 RO2R + 0.024 RO2N + 0.094 GLYOX + 0.239 K06000 + 0.109 MGLYO + 0.498 DCB1 + 0.190 CRES + 0.049 DCB3                                                                                        | 0.710E-11 | 0.0 | 0    |
| HO + T124B   | → | 0.186 HO2 + 2.729 XC + 0.044 BALD + 0.804 RO2R + 0.010 RO2N + 0.063 GLYOX + 0.079 BIACE + 0.364 MGLYO + 0.733 DCB1 + 0.186 CRES + 0.027 DCB3                                                                            | 0.325E-10 | 0.0 | 0    |
| HO + D02000  | → | <2NONO2_AC> + CO2                                                                                                                                                                                                       | 0.560E-11 | 0.0 | -310 |
| NO3 + D02000 | → | <2NONO2_AC> + CO2 + HNO3                                                                                                                                                                                                | 0.140E-11 | 0.0 | 1860 |
| HO + D03000  | → | CO2 + <2RO2_A2> + D02000                                                                                                                                                                                                | 0.200E-10 | 0.0 | 0    |
| NO3 + D03000 | → | CO2 + <2RO2_A2> + D02000 + HNO3                                                                                                                                                                                         | 0.600E-14 | 0.0 | 0    |
| HO + D04000  | → | 0.006 XC + 0.014 CO + 0.862 CO2 + 0.840 <2RO2_A2> + 0.117 <1RO2_7> + 0.022 <1N03001#2> + 0.006 <1N03001#7> + 0.015 <2RO2_72> + 0.022 <1NONO2_A> + 0.014 CH2O + 0.015 D02000 + 0.957 D03000 + 0.029 K04000 + 0.001 GLYOX | 0.526E-11 | 0.0 | -446 |
| NO3 + D04000 | → | CO2 + 0.975 <2RO2_A2> + 0.025 <1N03001#2> + 0.025 <1NONO2_A> + 0.975 D03000 + HNO3                                                                                                                                      | 0.117E-13 | 0.0 | 0    |
| HO + D04001  | → | 0.003 XC + 0.057 CO + 0.940 CO2 + 0.057 <1RO2_7> + 0.058 <1N03001#7> + 0.055 <1NONO2_A> + 0.884 <2RO2_A7> + 0.942 ACETO                                                                                                 | 0.661E-11 | 0.0 | -411 |

|              |   |                                                                                                                                                                                                                                                                                                                                |           |     |       |
|--------------|---|--------------------------------------------------------------------------------------------------------------------------------------------------------------------------------------------------------------------------------------------------------------------------------------------------------------------------------|-----------|-----|-------|
| NO3 + D04001 | → | CO2 + 0.059 <1N03001#7> + 0.059 <1NONO2_A> + 0.941 <2RO2_A7> + 0.941 ACETO + HNO3                                                                                                                                                                                                                                              | 0.124E-13 | 0.0 | 0     |
| HO + BALD    | → | BZCOO2                                                                                                                                                                                                                                                                                                                         | 0.129E-10 | 0.0 | 0     |
| NO3 + BALD   | → | HNO3 + BZCOO2                                                                                                                                                                                                                                                                                                                  | 0.140E-11 | 0.0 | 1872  |
| HO + ACETO   | → | 0.975 CO2 + 0.025 <1N03001#2> + 0.975 <3NONO2_2AC> + 0.975 CH2O                                                                                                                                                                                                                                                                | 0.211E-17 | 2.0 | -10   |
| HO + K04000  | → | 0.045 XC + 0.575 CO2 + 0.380 <1RO2_2> + 0.045 <1N03001#2> + 0.506 <3NONO2_2AC> + 0.069 <3RO2_2A2> + 0.069 CH2O + 0.575 D02000 + 0.380 D03000 + 0.095 K04000                                                                                                                                                                    | 0.253E-17 | 2.0 | -503  |
| HO + K06001  | → | 0.114 XC + 0.866 CO2 + 0.020 <1N03001#2> + 0.011 <1NITR01#2> + 0.103 <1NITR01#7> + 0.804 <1NONO2_7> + 0.866 <3NONO2_2AC> + 0.784 CH2O + 0.082 D04001 + 0.804 ACETO                                                                                                                                                             | 0.759E-12 | 0.0 | -834  |
| HO + O02000  | → | HO2 + D02000                                                                                                                                                                                                                                                                                                                   | 0.410E-11 | 0.0 | 70    |
| HO + EK3000  | → | 0.865 CO + 0.975 <1RO2_2> + 0.025 <1N03001#2> + 0.865 A02000 + 0.110 ED3000                                                                                                                                                                                                                                                    | 0.530E-12 | 0.0 | 128   |
| HO + EK4000  | → | 0.045 XC + 0.805 CO2 + 0.151 <1RO2_2> + 0.045 <1N03001#2> + 0.770 <3NONO2_2AC> + 0.035 <2NONO2_2C> + 0.035 D02000 + 0.090 D03000 + 0.083 K04000 + 0.770 A02000                                                                                                                                                                 | 0.160E-11 | 0.0 | 0     |
| HO + EK5001  | → | 0.853 CO2 + 0.071 <1RO2_2> + 0.845 <2NONO2_7C> + 0.001 <2RO2_22> + 0.008 <1NONO2_2> + 0.006 <1NITR01#2> + 0.069 <1NITR01#7> + 0.008 <3NONO2_2AC> + 0.009 CH2O + 0.071 D03000 + 0.845 ACETO + 0.036 K04000 + 0.008 A02000                                                                                                       | 0.301E-12 | 0.0 | -770  |
| HO + EK6000  | → | 0.131 XC + 0.223 CO2 + 0.463 <1RO2_7> + 0.018 <1RO2_2> + 0.007 <1N03001#2> + 0.116 <2RO2_22> + 0.048 <2RO2_72> + 0.048 <1NITR01#2> + 0.066 <1NITR01#7> + 0.015 <1NITR02#2> + 0.002 <1NONO2_7> + 0.206 <3RO2_2A2> + 0.012 <2NONO2_2C> + 0.009 C04000 + 0.050 D02000 + 0.370 D03000 + 0.012 D04000 + 0.465 K04000 + 0.463 EK3000 | 0.210E-11 | 0.0 | -299  |
| NO + RO2R    | → | HO2 + NO2                                                                                                                                                                                                                                                                                                                      | 0.270E-11 | 0.0 | -360  |
| HO2 + RO2R   | → | -3.000 XC + H03000                                                                                                                                                                                                                                                                                                             | 0.264E-12 | 0.0 | -1250 |
| NO3 + RO2R   | → | HO2 + NO2                                                                                                                                                                                                                                                                                                                      | 0.230E-11 | 0.0 | 0     |
| RO2R + CH3O2 | → | 0.680 HO2 + 0.670 CH2O + 0.330 CH3OH                                                                                                                                                                                                                                                                                           | 0.282E-13 | 0.0 | -845  |
| NO + RO2N    | → | 0.250 C04000 + N05001                                                                                                                                                                                                                                                                                                          | 0.270E-11 | 0.0 | -360  |
| HO2 + RO2N   | → | 3.000 XC + H03000                                                                                                                                                                                                                                                                                                              | 0.264E-12 | 0.0 | -1250 |
| NO3 + RO2N   | → | HO2 + NO2 + 2.000 XC + K04000                                                                                                                                                                                                                                                                                                  | 0.230E-11 | 0.0 | 0     |
| RO2N + CH3O2 | → | 0.680 HO2 + 0.680 XC + 0.670 CH2O + 0.340 K04000 + 0.330 CH3OH + 0.660 K06000                                                                                                                                                                                                                                                  | 0.282E-13 | 0.0 | -845  |
| NO + R2O2    | → | NO2                                                                                                                                                                                                                                                                                                                            | 0.270E-11 | 0.0 | -360  |
| HO2 + R2O2   | → | HO2                                                                                                                                                                                                                                                                                                                            | 0.264E-12 | 0.0 | -1250 |
| NO3 + R2O2   | → | NO2                                                                                                                                                                                                                                                                                                                            | 0.230E-11 | 0.0 | 0     |
| R2O2 + CH3O2 | → | CH3O2                                                                                                                                                                                                                                                                                                                          | 0.282E-13 | 0.0 | -845  |
| HO + A03000  | → | 0.410 CO + 0.448 CO2 + 0.576 <1RO2_2> + 0.014 <1N03001#2> + 0.410 <1OHRO2_2> + 0.859 D02000 + 0.128 AD3000                                                                                                                                                                                                                     | 0.120E-11 | 0.0 | 0     |
| HO + MVKET   | → | 0.045 XC + 0.764 CO2 + 0.191 <1RO2_2> + 0.045 <1N03001#2> + 0.764 <3NONO2_2AC> + 0.190 CH2O + 0.764 D02000 + 0.191 MGLYO + 0.001 OPEALC                                                                                                                                                                                        | 0.267E-11 | 0.0 | -612  |
| O3 + MVKET   | → | 0.123 H2 + 0.164 HO + 0.114 HO2 + 0.050 <2NONO2_AC> + 0.525 CO + 0.174 CO2 + 0.050 CH2O + 0.352 HCOOH + 0.950 MGLYO                                                                                                                                                                                                            | 0.890E-15 | 0.0 | 1521  |
| NO3 + MVKET  | → | 0.045 XC + 0.955 CO2 + 0.045 <1N03001#2> + 0.955 <3NONO2_2AC> + 0.045 XN2 + 0.955 ND2000                                                                                                                                                                                                                                       | 0.120E-15 | 0.0 | 0     |
| HO + MEACR   | → | 0.022 XC + 0.338 CO + 1.027 CO2 + 0.372 <1RO2_7> + 0.093 <1RO2_2> + 0.004 <1N03001#2> + 0.018 <1N03001#7> + 0.513 <3NONO2_AAC> + 0.640 CH2O + 0.465 MGLYO + 0.338 OPEALC                                                                                                                                                       | 0.773E-11 | 0.0 | -379  |
| O3 + MEACR   | → | 0.117 H2 + 0.208 HO + 0.108 HO2 + 0.100 <2NONO2_AC> + 0.550 CO + 0.217 CO2 + 0.100 CH2O + 0.333 HCOOH + 0.900 MGLYO                                                                                                                                                                                                            | 0.136E-14 | 0.0 | 2112  |
| NO3 + MEACR  | → | 0.018 XC + 0.373 CO + 1.220 CO2 + 0.373 <1RO2_7> + 0.018 <1N03001#7> + 0.610 <3NONO2_AAC> + 0.610 CH2O + 0.018 XN2 + 0.373 NK3000 + 0.610 HNO3                                                                                                                                                                                 | 0.134E-11 | 0.0 | 1726  |
| HO + N03001  | → | 0.738 HO2 + 0.145 NO2 + 0.112 <1RO2_2> + 0.003 <1N03001#2> + 0.003 <1_2NO2_2> + 0.003 CH2O + 0.003 D02000 + 0.882 ACETO + 0.003 XN2 + 0.738 HNO3 + 0.112 N03002                                                                                                                                                                | 0.620E-12 | 0.0 | 230   |
| HO + GLYOX   | → | 0.700 HO2 + 1.700 CO + 0.300 CO2 + 0.300 <1RO2_A>                                                                                                                                                                                                                                                                              | 0.110E-10 | 0.0 | 0     |
| NO3 + GLYOX  | → | 0.700 HO2 + 1.700 CO + 0.300 CO2 + 0.300 <1RO2_A> + HNO3                                                                                                                                                                                                                                                                       | 0.280E-11 | 0.0 | 2375  |
| HO + NU4000  | → | 0.045 XC + 0.764 CO2 + 0.191 <1RO2_2> + 0.045 <1N03001#2> + 0.764 <2_2NO2_2A> + 0.954 CH2O + 0.001 N03001 + 0.045 XN2 + 0.764 D02000 + 0.190 ND3000                                                                                                                                                                            | 0.241E-10 | 0.0 | 0     |
| O3 + NU4000  | → | 0.123 H2 + 0.164 HO + 0.114 HO2 + 0.525 CO + 0.174 CO2 + 0.050 <1_2NO2_A> + 0.100 CH2O + 0.352 HCOOH + 0.950 ND3000                                                                                                                                                                                                            | 0.539E-17 | 0.0 | 0     |
| NO3 + NU4000 | → | 0.045 XC + 0.955 CO2 + 0.045 <1N03001#2> + 0.955 <2_2NO2_2A> + 0.955 CH2O + 0.090 XN2 + 0.955 ND2000                                                                                                                                                                                                                           | 0.120E-15 | 0.0 | 0     |

|                                         |   |                                                                                                                                                                                                                                                                                                                                                       |           |      |       |
|-----------------------------------------|---|-------------------------------------------------------------------------------------------------------------------------------------------------------------------------------------------------------------------------------------------------------------------------------------------------------------------------------------------------------|-----------|------|-------|
| HO + BIACE                              | → | 0.045 XC + 0.955 CO + 0.955 CO <sub>2</sub> + 0.045 <1N03001#2> + 0.955 <3NONO2_2AC> + 0.955 CH <sub>2</sub> O                                                                                                                                                                                                                                        | 0.140E-17 | 2.0  | -194  |
| HO + K06000                             | → | 0.115 XC + 0.179 CO <sub>2</sub> + 0.561 <1RO2_7> + 0.003 <1N03001#2> + 0.143 <2RO2_72> + 0.015 <1NITR01#2> + 0.099 <1NITR01#7> + 0.070 <1NONO2_7> + 0.180 <3NONO2_2AC> + 0.561 C04000 + 0.067 CH <sub>2</sub> O + 0.144 D02000 + 0.211 D03000 + 0.113 D04000 + 1.157 K04000                                                                          | 0.910E-11 | 0.0  | 0     |
| HO + D02000                             | → | 0.097 HO <sub>2</sub> + 0.904 CO <sub>2</sub> + 0.904 <1RO2_A> + 0.904 CH <sub>2</sub> O + 0.097 GLYOX                                                                                                                                                                                                                                                | 0.100E-10 | 0.0  | 0     |
| NO <sub>3</sub> + D02000                | → | CO <sub>2</sub> + <1RO2_A> + CH <sub>2</sub> O + HNO <sub>3</sub>                                                                                                                                                                                                                                                                                     | 0.120E-13 | 0.0  | 0     |
| HO + ND2000                             | → | 0.077 HO <sub>2</sub> + 0.071 CO + 0.923 CO <sub>2</sub> + 0.923 <1_2NO2_A> + 0.994 CH <sub>2</sub> O + 0.006 GLYOX + 0.077 HNO <sub>3</sub>                                                                                                                                                                                                          | 0.454E-11 | 0.0  | 0     |
| NO <sub>3</sub> + ND2000                | → | CO <sub>2</sub> + <1_2NO2_A> + CH <sub>2</sub> O + HNO <sub>3</sub>                                                                                                                                                                                                                                                                                   | 0.120E-13 | 0.0  | 0     |
| HO + MGLYO                              | → | <2NONO2_AC> + CO + CO <sub>2</sub>                                                                                                                                                                                                                                                                                                                    | 0.840E-12 | 0.0  | -830  |
| NO <sub>3</sub> + MGLYO                 | → | <2NONO2_AC> + CO + CO <sub>2</sub> + HNO <sub>3</sub>                                                                                                                                                                                                                                                                                                 | 0.240E-14 | 0.0  | 0     |
| HO + A02000                             | → | 0.113 CO + 0.886 CO <sub>2</sub> + 0.001 <1RO2_2> + 0.113 <1OHRO2_2> + 0.113 CH <sub>2</sub> O + 0.886 CH <sub>3</sub> O <sub>2</sub> + 0.001 AD2000                                                                                                                                                                                                  | 0.800E-12 | 0.0  | 0     |
| HO + NK3000                             | → | 0.050 NO <sub>2</sub> + 0.758 <2NONO2_AC> + 0.945 CO <sub>2</sub> + 0.005 <1N03001#2> + 0.187 <2_2NO2_2A> + 1.132 CH <sub>2</sub> O + 0.005 XN <sub>2</sub> + 0.050 MGLYO + 0.758 HNO <sub>3</sub>                                                                                                                                                    | 0.490E-12 | 0.0  | 0     |
| HO + PHEN                               | → | 4.100 XC + 0.760 RO <sub>2</sub> R + 0.230 GLYOX + 0.240 BZO                                                                                                                                                                                                                                                                                          | 0.263E-10 | 0.0  | 0     |
| NO <sub>3</sub> + PHEN                  | → | HNO <sub>3</sub> + BZO                                                                                                                                                                                                                                                                                                                                | 0.378E-11 | 0.0  | 0     |
| HO + DCB1                               | → | CO + D03000 + RO <sub>2</sub> R                                                                                                                                                                                                                                                                                                                       | 0.500E-10 | 0.0  | 0     |
| O <sub>3</sub> + DCB1                   | → | 0.500 HO + 1.500 HO <sub>2</sub> + 1.500 CO + 0.500 CO <sub>2</sub> + GLYOX                                                                                                                                                                                                                                                                           | 0.200E-17 | 0.0  | 0     |
| HO + CRES                               | → | 4.870 XC + 0.760 RO <sub>2</sub> R + 0.230 MGLYO + 0.240 BZO                                                                                                                                                                                                                                                                                          | 0.420E-10 | 0.0  | 0     |
| NO <sub>3</sub> + CRES                  | → | XC + HNO <sub>3</sub> + BZO                                                                                                                                                                                                                                                                                                                           | 0.137E-10 | 0.0  | 0     |
| HO + DCB2                               | → | <2NONO2_AC> + CO <sub>2</sub> + D03000 + R <sub>2</sub> O <sub>2</sub>                                                                                                                                                                                                                                                                                | 0.500E-10 | 0.0  | 0     |
| HO + DCB3                               | → | <2NONO2_AC> + CO <sub>2</sub> + D03000 + R <sub>2</sub> O <sub>2</sub>                                                                                                                                                                                                                                                                                | 0.500E-10 | 0.0  | 0     |
| NO <sub>2</sub> + BZCOO2                | → | PBZN                                                                                                                                                                                                                                                                                                                                                  | 0.330E-08 | -1.0 | 0     |
| NO + BZCOO2                             | → | NO <sub>2</sub> + CO <sub>2</sub> + R <sub>2</sub> O <sub>2</sub> + BZO                                                                                                                                                                                                                                                                               | 0.810E-11 | 0.0  | -270  |
| HO <sub>2</sub> + BZCOO2                | → | 0.800 O <sub>3</sub> + 4.000 XC + 0.200 A03000 + 0.800 G03000                                                                                                                                                                                                                                                                                         | 0.640E-12 | 0.0  | -925  |
| NO <sub>3</sub> + BZCOO2                | → | NO <sub>2</sub> + CO <sub>2</sub> + R <sub>2</sub> O <sub>2</sub> + BZO                                                                                                                                                                                                                                                                               | 0.500E-11 | 0.0  | 0     |
| CH <sub>3</sub> O <sub>2</sub> + BZCOO2 | → | 0.680 HO <sub>2</sub> + 1.280 XC + 0.680 CO <sub>2</sub> + CH <sub>2</sub> O + 0.680 R <sub>2</sub> O <sub>2</sub> + 0.320 A03000 + 0.680 BZO                                                                                                                                                                                                         | 0.100E-10 | 0.0  | 0     |
| HO + ED3000                             | → | 0.975 CO + 0.975 CO <sub>2</sub> + 0.975 <1RO2_2> + 0.025 <1N03001#2> + 0.975 CH <sub>2</sub> O                                                                                                                                                                                                                                                       | 0.422E-13 | 0.0  | 0     |
| NO <sub>3</sub> + ED3000                | → | <2NONO2_AC> + 2.000 CO <sub>2</sub> + HNO <sub>3</sub>                                                                                                                                                                                                                                                                                                | 0.120E-13 | 0.0  | 0     |
| HO + H03000                             | → | 0.781 HO + 0.209 <1RO2_2> + 0.005 <1N03001#2> + 0.005 <1OHRO2_2> + 0.005 CH <sub>2</sub> O + 0.005 D02000 + 0.945 D03000 + 0.045 HK3000                                                                                                                                                                                                               | 0.220E-10 | 0.0  | 0     |
| HO + N05001                             | → | 0.047 HO <sub>2</sub> + 0.338 <1RO2_7> + 0.227 <1RO2_2> + 0.003 <1N03001#2> + 0.197 <2RO2_72> + 0.034 <1NITR01#2> + 0.045 <1NITR01#7> + 0.009 <1NONO2_7> + 0.109 <1_2NO2_2> + 0.003 <2_2NO2_72> + 0.003 CH <sub>2</sub> O + 0.196 D02000 + 0.147 D03000 + 0.460 K04000 + 0.511 N03001 + 0.070 XN <sub>2</sub> + 0.043 OPEALC + 0.191 HNO <sub>3</sub> | 0.185E-11 | 0.0  | 0     |
| HO + AD3000                             | → | 0.992 CO + CO <sub>2</sub> + 0.008 <2RO2_A2> + 0.992 <2OHRO2_A2> + 0.992 CH <sub>2</sub> O + 0.008 AD2000                                                                                                                                                                                                                                             | 0.216E-10 | 0.0  | 0     |
| NO <sub>3</sub> + AD3000                | → | 0.992 CO + CO <sub>2</sub> + 0.008 <2RO2_A2> + 0.992 <2OHRO2_A2> + 0.992 CH <sub>2</sub> O + HNO <sub>3</sub> + 0.008 AD2000                                                                                                                                                                                                                          | 0.120E-13 | 0.0  | 0     |
| HO + N03002                             | → | 0.077 HO <sub>2</sub> + 0.077 CO + 0.923 CO <sub>2</sub> + 0.923 <1_2NO2_A> + D02000 + 0.077 HNO <sub>3</sub>                                                                                                                                                                                                                                         | 0.459E-11 | 0.0  | 0     |
| NO <sub>3</sub> + N03002                | → | CO <sub>2</sub> + <1_2NO2_A> + D02000 + HNO <sub>3</sub>                                                                                                                                                                                                                                                                                              | 0.120E-13 | 0.0  | 0     |
| HO + ND3000                             | → | CO + CO <sub>2</sub> + <1_2NO2_A> + CH <sub>2</sub> O                                                                                                                                                                                                                                                                                                 | 0.130E-10 | 0.0  | 0     |
| NO <sub>3</sub> + ND3000                | → | CO + CO <sub>2</sub> + <1_2NO2_A> + CH <sub>2</sub> O + HNO <sub>3</sub>                                                                                                                                                                                                                                                                              | 0.240E-14 | 0.0  | 0     |
| HO + NU3000                             | → | 0.975 <1RO2_2> + 0.025 <1N03001#2> + 0.966 CH <sub>2</sub> O + 0.034 XN <sub>2</sub> + 0.966 ND2000 + 0.009 MGLYO + 0.009 OPEALC                                                                                                                                                                                                                      | 0.347E-10 | 0.0  | 0     |
| O <sub>3</sub> + NU3000                 | → | 0.065 H <sub>2</sub> + 0.320 HO + 0.060 HO <sub>2</sub> + 0.330 NO <sub>2</sub> + 0.510 CO + 0.135 CO <sub>2</sub> + 0.830 CH <sub>2</sub> O + 0.185 HCOOH + 0.500 ND2000 + 0.170 AN2000                                                                                                                                                              | 0.101E-16 | 0.0  | 0     |
| NO <sub>3</sub> + NU3000                | → | 0.975 <1RO2_2> + 0.025 <1N03001#2> + 0.050 XN <sub>2</sub> + 0.975 NN3001                                                                                                                                                                                                                                                                             | 0.135E-13 | 0.0  | 0     |
| HO + AD2000                             | → | HO + 2.000 CO                                                                                                                                                                                                                                                                                                                                         | 0.986E-11 | 0.0  | 0     |
| NO <sub>3</sub> + AD2000                | → | HO + 2.000 CO + HNO <sub>3</sub>                                                                                                                                                                                                                                                                                                                      | 0.240E-14 | 0.0  | 0     |
| NO <sub>2</sub> + BZO                   | → | NPHE                                                                                                                                                                                                                                                                                                                                                  | 0.230E-10 | 0.0  | -151  |
| HO <sub>2</sub> + BZO                   | → | PHEN                                                                                                                                                                                                                                                                                                                                                  | 0.190E-12 | 0.0  | -1298 |
| BZO                                     | → | PHEN                                                                                                                                                                                                                                                                                                                                                  | 0.100E-02 | 0.0  | 0     |
| PBZN                                    | → | NO <sub>2</sub> + BZCOO2                                                                                                                                                                                                                                                                                                                              | 0.790E+17 | 0.0  | 14000 |
| HO + G03000                             | → | 0.150 CO + 0.846 CO <sub>2</sub> + 0.846 <2RO2_A2> + 0.150 <1RO2_2> + 0.004 <1N03001#2> + 0.996 D02000                                                                                                                                                                                                                                                | 0.449E-11 | 0.0  | 0     |
| HO + HK3000                             | → | 0.736 HO + 0.258 CO <sub>2</sub> + 0.007 <1N03001#2> + 0.258 <3NONO2_2AC> + 0.258 CH <sub>2</sub> O + 0.736 MGLYO                                                                                                                                                                                                                                     | 0.140E-10 | 0.0  | 0     |
| HO + AN2000                             | → | 0.406 HO + 0.003 HO <sub>2</sub> + 0.591 NO <sub>2</sub> + 0.406 CO + 0.591 CO <sub>2</sub> + 0.997 CH <sub>2</sub> O + 0.409 HNO <sub>3</sub> + 0.003 AD2000                                                                                                                                                                                         | 0.897E-12 | 0.0  | 0     |



|              |   |                                                                                                                                     |           |     |       |
|--------------|---|-------------------------------------------------------------------------------------------------------------------------------------|-----------|-----|-------|
| HO + NN3001  | → | 0.062 NO2 + 0.938 CO2 + 0.938 <1_2NO2_A> + 1.876 CH2O + 0.938 HNO3 + 0.062 ND3000                                                   | 0.776E-12 | 0.0 | 0     |
| HO + ACROL   | → | 0.863 CO + 0.674 CO2 + 0.318 <1RO2_2> + 0.008 <1N03001#2> + 0.674 <1RO2_A> + 0.688 CH2O + 0.126 GLYOX + 0.245 DO2000 + 0.002 DK3000 | 0.655E-11 | 0.0 | -333  |
| O3 + ACROL   | → | 0.123 H2 + 0.139 HO + 0.189 HO2 + 0.550 CO + 0.148 CO2 + 0.050 CH2O + 0.950 GLYOX + 0.352 HCOOH                                     | 0.136E-14 | 0.0 | 2519  |
| NO3 + ACROL  | → | 0.917 CO + CO2 + <1RO2_A> + 0.917 CH2O + 0.083 GLYOX + HNO3                                                                         | 0.250E-14 | 0.0 | 0     |
| NO3 + NPHE   | → | HNO3 + BZNO2O                                                                                                                       | 0.378E-11 | 0.0 | 0     |
| HO + DK3000  | → | 0.151 HO2 + 0.849 CO + 0.849 CO2 + 0.849 <1RO2_A> + 0.849 CH2O + 0.151 DD3002                                                       | 0.152E-10 | 0.0 | 0     |
| NO3 + DK3000 | → | CO + CO2 + <1RO2_A> + CH2O + HNO3                                                                                                   | 0.240E-14 | 0.0 | 0     |
| NO2 + BZNO2O | → | 6.000 XC + 2.000 XN                                                                                                                 | 0.230E-10 | 0.0 | -151  |
| HO2 + BZNO2O | → | NPHE                                                                                                                                | 0.190E-12 | 0.0 | -1298 |
| BZNO2O       | → | NPHE                                                                                                                                | 0.100E-02 | 0.0 | 0     |
| HO + DD3002  | → | 2.000 CO + CO2 + <1RO2_A>                                                                                                           | 0.253E-10 | 0.0 | 0     |
| NO3 + DD3002 | → | 2.000 CO + CO2 + <1RO2_A> + HNO3                                                                                                    | 0.480E-14 | 0.0 | 0     |

| peroxy permutation reactions |   |                                                    | A         | n   | Ea/R  |
|------------------------------|---|----------------------------------------------------|-----------|-----|-------|
| <1RO2_A> + C_PERO2           | → | 0.750 HO2                                          | 0.100E-10 | 0.0 | 0     |
| <1RO2_A> + C_PERO9           | → | HO2                                                | 0.500E-11 | 0.0 | -500  |
| <1RO2_2> + C_PERO2           | → | 0.500 HO2                                          | 0.156E-13 | 0.0 | -1500 |
| <1RO2_2> + C_PERO9           | → | 0.750 HO2                                          | 0.100E-10 | 0.0 | 0     |
| <1NONO2_A> + C_PERO2         | → |                                                    | 0.100E-10 | 0.0 | 0     |
| <1NONO2_A> + C_PERO9         | → |                                                    | 0.500E-11 | 0.0 | -500  |
| <1NONO2_2> + C_PERO2         | → |                                                    | 0.156E-13 | 0.0 | -1500 |
| <1NONO2_2> + C_PERO9         | → |                                                    | 0.100E-10 | 0.0 | 0     |
| <1OHRO2_2> + C_PERO2         | → | 0.500 HO                                           | 0.156E-13 | 0.0 | -1500 |
| <1OHRO2_2> + C_PERO9         | → | 0.750 HO                                           | 0.100E-10 | 0.0 | 0     |
| <1_2NO2_A> + C_PERO2         | → | 0.750 NO2 + 0.250 XN                               | 0.100E-10 | 0.0 | 0     |
| <1_2NO2_A> + C_PERO9         | → | NO2                                                | 0.500E-11 | 0.0 | -500  |
| <1_2NO2_2> + C_PERO2         | → | 0.500 NO2 + 0.500 XN                               | 0.156E-13 | 0.0 | -1500 |
| <1_2NO2_2> + C_PERO9         | → | 0.750 NO2 + 0.250 XN                               | 0.100E-10 | 0.0 | 0     |
| <2NONO2_AC> + C_PERO2        | → | 0.750 CH3O2                                        | 0.100E-10 | 0.0 | 0     |
| <2NONO2_AC> + C_PERO9        | → | CH3O2                                              | 0.500E-11 | 0.0 | -500  |
| <1N03001#2> + C_PERO2        | → | 0.500 HO2 + 3.000 XC                               | 0.156E-13 | 0.0 | -1500 |
| <1N03001#2> + C_PERO9        | → | 0.750 HO2 + 3.000 XC                               | 0.100E-10 | 0.0 | 0     |
| <1NITR01#2> + C_PERO2        | → | 0.500 HO2                                          | 0.156E-13 | 0.0 | -1500 |
| <1NITR01#2> + C_PERO9        | → | 0.750 HO2                                          | 0.100E-10 | 0.0 | 0     |
| <1NITR02#2> + C_PERO2        | → | 0.500 HO2                                          | 0.156E-13 | 0.0 | -1500 |
| <1NITR02#2> + C_PERO9        | → | 0.750 HO2                                          | 0.100E-10 | 0.0 | 0     |
| <2RO2_A2> + C_PERO2          | → | 0.750 <1RO2_2>                                     | 0.100E-10 | 0.0 | 0     |
| <2RO2_A2> + C_PERO9          | → | <1RO2_2>                                           | 0.500E-11 | 0.0 | -500  |
| <2RO2_2A> + C_PERO2          | → | 0.500 <1RO2_A>                                     | 0.156E-13 | 0.0 | -1500 |
| <2RO2_2A> + C_PERO9          | → | 0.750 <1RO2_A>                                     | 0.100E-10 | 0.0 | 0     |
| <2RO2_22> + C_PERO2          | → | 0.500 <1RO2_2>                                     | 0.156E-13 | 0.0 | -1500 |
| <2RO2_22> + C_PERO9          | → | 0.750 <1RO2_2>                                     | 0.100E-10 | 0.0 | 0     |
| <2RO2_27> + C_PERO2          | → | 0.500 <1RO2_7>                                     | 0.156E-13 | 0.0 | -1500 |
| <2RO2_27> + C_PERO9          | → | 0.750 <1RO2_7>                                     | 0.100E-10 | 0.0 | 0     |
| <3RO2_2A2> + C_PERO2         | → | 0.500 <2RO2_A2>                                    | 0.156E-13 | 0.0 | -1500 |
| <3RO2_2A2> + C_PERO9         | → | 0.750 <2RO2_A2>                                    | 0.100E-10 | 0.0 | 0     |
| <2RO2_A7> + C_PERO2          | → | 0.750 <1RO2_7>                                     | 0.100E-10 | 0.0 | 0     |
| <2RO2_A7> + C_PERO9          | → | <1RO2_7>                                           | 0.500E-11 | 0.0 | -500  |
| <2OHRO2_A2> + C_PERO2        | → | 0.750 <1OHRO2_2>                                   | 0.100E-10 | 0.0 | 0     |
| <2OHRO2_A2> + C_PERO9        | → | <1OHRO2_2>                                         | 0.500E-11 | 0.0 | -500  |
| <3NONO2_2AC> + C_PERO2       | → | 0.500 <2NONO2_AC>                                  | 0.156E-13 | 0.0 | -1500 |
| <3NONO2_2AC> + C_PERO9       | → | 0.750 <2NONO2_AC>                                  | 0.100E-10 | 0.0 | 0     |
| <2NONO2_2C> + C_PERO2        | → | 0.500 CH3O2                                        | 0.156E-13 | 0.0 | -1500 |
| <2NONO2_2C> + C_PERO9        | → | 0.750 CH3O2                                        | 0.100E-10 | 0.0 | 0     |
| <3NONO2_AAC> + C_PERO2       | → | 0.750 <2NONO2_AC>                                  | 0.100E-10 | 0.0 | 0     |
| <3NONO2_AAC> + C_PERO9       | → | <2NONO2_AC>                                        | 0.500E-11 | 0.0 | -500  |
| <2_2NO2_2A> + C_PERO2        | → | 0.500 <1_2NO2_A> + 0.500 XN                        | 0.156E-13 | 0.0 | -1500 |
| <2_2NO2_2A> + C_PERO9        | → | 0.750 <1_2NO2_A> + 0.250 XN                        | 0.100E-10 | 0.0 | 0     |
| RO2R + C_PERO2               | → | 0.400 HO2                                          | 0.162E-13 | 0.0 | -1400 |
| RO2R + C_PERO9               | → | 0.650 HO2                                          | 0.100E-10 | 0.0 | 0     |
| RO2N + C_PERO2               | → | 0.400 HO2 + 0.800 XC + 0.400 K04000 + 0.600 K06000 | 0.162E-13 | 0.0 | -1400 |
| RO2N + C_PERO9               | → | 0.650 HO2 + 1.300 XC + 0.650 K04000 + 0.350 K06000 | 0.100E-10 | 0.0 | 0     |
| R2O2 + C_PERO2               | → |                                                    | 0.162E-13 | 0.0 | -1400 |
| R2O2 + C_PERO9               | → |                                                    | 0.100E-10 | 0.0 | 0     |

|                                                   |   |                                                                                                                                                                      |           |        |      |
|---------------------------------------------------|---|----------------------------------------------------------------------------------------------------------------------------------------------------------------------|-----------|--------|------|
| BZCOO2 + C_PERO2                                  | → | XC + 0.750 CO2 + 0.750 R2O2 + 0.250 A03000 + 0.750 BZO                                                                                                               | 0.100E-10 | 0.0    | 0    |
| BZCOO2 + C_PERO9                                  | → | CO2 + R2O2 + BZO                                                                                                                                                     | 0.500E-11 | 0.0    | -500 |
| <b>fall-off reactions</b>                         |   |                                                                                                                                                                      |           |        |      |
| PAN2NONO2AC (+M)                                  | → | NO2 + <2NONO2_AC>(+M)                                                                                                                                                |           |        |      |
| k <sub>0</sub> = 0.190E-02 exp(-12175/T)          |   |                                                                                                                                                                      |           |        |      |
| k <sub>∞</sub> = 0.280E+17 exp(-13580/T)          |   |                                                                                                                                                                      |           |        |      |
| Fc= 0.6                                           |   |                                                                                                                                                                      |           |        |      |
| NO2 + <2NONO2_AC> (+M)                            | → | PAN2NONO2AC(+M)                                                                                                                                                      |           |        |      |
| k <sub>0</sub> = 0.850E-28 (T/300) <sup>6.5</sup> |   |                                                                                                                                                                      |           |        |      |
| k <sub>∞</sub> = 0.110E-10 (T/300) <sup>1.0</sup> |   |                                                                                                                                                                      |           |        |      |
| Fc= 0.6                                           |   |                                                                                                                                                                      |           |        |      |
| <b>photolytic reactions</b>                       |   |                                                                                                                                                                      | label     | factor |      |
| NITR01 + HV                                       | → | 0.244 HO2 + NO2 + 0.699 <1RO2_2> + 0.057 <1NITR01#2> + 0.061 C04000 + 1.118 K04000 + 0.175 OPEALC                                                                    | 900       | 1.0    |      |
| NITR02 + HV                                       | → | 0.244 HO2 + NO2 + 0.699 <1RO2_2> + 0.057 <1NITR01#2> + 0.061 C04000 + 1.118 K04000 + 0.175 OPEALC                                                                    | 900       | 1.0    |      |
| XN2 + HV                                          | → | HO2 + NO2                                                                                                                                                            | 900       | 1.0    |      |
| PAN2NONO2AC + HV                                  | → | NO2 + <2NONO2_AC>                                                                                                                                                    | 1400      | 1.0    |      |
| PA2NONO2AC + HV                                   | → | HO + <2NONO2_AC>                                                                                                                                                     | 40100     | 1.0    |      |
| HP1NITR02#2 + HV                                  | → | HO + HO2                                                                                                                                                             | 40100     | 1.0    |      |
| HP2RO2_22 + HV                                    | → | HO + HO2                                                                                                                                                             | 40100     | 1.0    |      |
| D02000 + HV                                       | → | HO2 + CO + CH3O2                                                                                                                                                     | 1700      | 1.0    |      |
| D03000 + HV                                       | → | HO2 + CO + <1RO2_2> + D02000                                                                                                                                         | 1800      | 1.0    |      |
| D04000 + HV                                       | → | HO2 + CO + 0.975 <1RO2_2> + 0.025 <1N03001#2> + 0.975 D03000                                                                                                         | 1900      | 1.0    |      |
| D04000 + HV                                       | → | U02000 + D02000                                                                                                                                                      | 2000      | 1.0    |      |
| D04001 + HV                                       | → | HO2 + CO + 0.941 <1RO2_7> + 0.059 <1N03001#7> + 0.941 ACETO                                                                                                          | 2100      | 1.0    |      |
| BALD + HV                                         | → | 7.000 XC                                                                                                                                                             | 14        | 1.0    |      |
| ACETO + HV                                        | → | <2NONO2_AC> + CO2 + CH3O2                                                                                                                                            | 3000      | 1.0    |      |
| K04000 + HV                                       | → | <2NONO2_AC> + CO2 + <1RO2_2> + D02000                                                                                                                                | 3100      | 1.0    |      |
| K04000 + HV                                       | → | CO2 + <2RO2_A2> + D02000 + CH3O2                                                                                                                                     | 3200      | 1.0    |      |
| K06001 + HV                                       | → | 0.045 XC + <2NONO2_AC> + CO2 + 0.673 <1RO2_2> + 0.045 <1N03001#2> + 0.017 <1N03001#7> + 0.017 <1NONO2_2> + 0.265 <2RO2_27> + 0.282 CH2O + 0.673 D04001 + 0.265 ACETO | 3600      | 1.0    |      |
| K06001 + HV                                       | → | U03000 + ACETO                                                                                                                                                       | 3700      | 1.0    |      |
| MVKET + HV                                        | → | CO + U03000                                                                                                                                                          | 4900      | 1.0    |      |
| MVKET + HV                                        | → | HO2 + <2NONO2_AC> + 0.917 CO + CO2 + 0.917 CH2O + 0.083 GLYOX                                                                                                        | 5000      | 1.0    |      |
| MEACR + HV                                        | → | HO2 + <2NONO2_AC> + CO + CO2 + CH2O                                                                                                                                  | 4300      | 1.0    |      |
| MEACR + HV                                        | → | HO + CO + 0.975 CO2 + 0.025 <1N03001#2> + 0.975 <3NONO2_2AC> + 0.975 CH2O                                                                                            | 4400      | 1.0    |      |
| MEACR + HV                                        | → | HO2 + 2.000 CO2 + <3NONO2_AAC> + CH2O                                                                                                                                | 4500      | 1.0    |      |
| N03001 + HV                                       | → | HO2 + NO2 + ACETO                                                                                                                                                    | 400       | 1.0    |      |
| GLYOX + HV                                        | → | H2 + 2.000 CO                                                                                                                                                        | 5100      | 1.0    |      |
| GLYOX + HV                                        | → | 2.000 HO2 + 2.000 CO                                                                                                                                                 | 5200      | 1.0    |      |
| GLYOX + HV                                        | → | CO + CH2O                                                                                                                                                            | 5300      | 1.0    |      |
| NU4000 + HV                                       | → | NO2 + 0.917 CO + CO2 + <1RO2_A> + 1.917 CH2O + 0.083 GLYOX                                                                                                           | 10100     | 1.0    |      |
| NU4000 + HV                                       | → | HO2 + 0.917 CO + CO2 + <1_2NO2_A> + 1.917 CH2O + 0.083 GLYOX                                                                                                         | 31700     | 1.0    |      |
| NU4000 + HV                                       | → | CO + NU3000                                                                                                                                                          | 31600     | 1.0    |      |
| BIACE + HV                                        | → | 2.000 <2NONO2_AC> + 2.000 CO2                                                                                                                                        | 5700      | 1.0    |      |
| K06000 + HV                                       | → | 0.076 XC + <2NONO2_AC> + CO2 + 0.261 <1RO2_2> + 0.076 <1N03001#2> + 0.663 <2RO2_22> + 0.031 <1NONO2_2> + 0.663 D03000 + 0.261 D04000 + 0.166 K04000 + 0.166 OPEALC   | 30200     | 1.0    |      |
| K06000 + HV                                       | → | U03000 + ACETO                                                                                                                                                       | 30300     | 1.0    |      |
| DO2000 + HV                                       | → | 2.000 HO2 + CO + CH2O                                                                                                                                                | 7400      | 1.0    |      |
| ND2000 + HV                                       | → | HO2 + NO2 + 0.917 CO + 0.917 CH2O + 0.083 GLYOX                                                                                                                      | 10100     | 1.0    |      |
| ND2000 + HV                                       | → | HO2 + NO2 + CO + CH2O                                                                                                                                                | 20300     | 1.0    |      |
| MGLYO + HV                                        | → | HO2 + <2NONO2_AC> + CO + CO2                                                                                                                                         | 5400      | 1.0    |      |
| MGLYO + HV                                        | → | CO + D02000                                                                                                                                                          | 5500      | 2.0    |      |
| MGLYO + HV                                        | → | 2.000 CO + CH4                                                                                                                                                       | 5600      | 1.0    |      |
| NK3000 + HV                                       | → | CO2 + <1_2NO2_A> + CH2O + CH3O2                                                                                                                                      | 30100     | 1.0    |      |
| NK3000 + HV                                       | → | NO2 + <2NONO2_AC> + CO2 + CH2O                                                                                                                                       | 10100     | 1.0    |      |
| DCB2 + HV                                         | → | 0.500 HO2 + 0.500 XC + 0.500 <2NONO2_AC> + CO + 0.500 CO2 + RO2R + R2O2 + 0.500 GLYOX + 0.500 MGLYO                                                                  | 12        | 1.0    |      |
| DCB3 + HV                                         | → | 0.500 HO2 + 0.500 XC + 0.500 <2NONO2_AC> + CO + 0.500 CO2 + RO2R + R2O2 + 0.500 GLYOX + 0.500 MGLYO                                                                  | 13        | 1.0    |      |
| H03000 + HV                                       | → | HO + HO2 + D03000                                                                                                                                                    | 40100     | 1.0    |      |



|             |   |                                                                                                   |       |     |
|-------------|---|---------------------------------------------------------------------------------------------------|-------|-----|
| N05001 + HV | → | 0.244 HO2 + NO2 + 0.699 <1RO2_2> + 0.057 <1NITR01#2> + 0.061 C04000 + 1.118 K04000 + 0.175 OPEALC | 900   | 1.0 |
| AD3000 + HV | → | HO2 + 1.992 CO + 0.008 <1RO2_2> + 0.992 <1OHRO2_2> + 0.992 CH2O + 0.008 AD2000                    | 20300 | 1.0 |
| N03002 + HV | → | HO2 + NO2 + 0.995 CO + 0.995 D02000 + 0.005 MGLYO                                                 | 10200 | 1.0 |
| N03002 + HV | → | HO2 + NO2 + CO + D02000                                                                           | 20300 | 1.0 |
| ND3000 + HV | → | NO2 + CO + CO2 + <1RO2_A> + CH2O                                                                  | 10100 | 1.0 |
| ND3000 + HV | → | HO2 + CO + CO2 + <1_2NO2_A> + CH2O                                                                | 21400 | 1.0 |
| ND3000 + HV | → | CO + ND2000                                                                                       | 21500 | 2.0 |
| NU3000 + HV | → | HO2 + NO2 + ACROL                                                                                 | 10100 | 1.0 |
| AD2000 + HV | → | CO2 + CH2O                                                                                        | 7800  | 1.0 |
| AD2000 + HV | → | 2.000 CO                                                                                          | 7900  | 1.0 |
| G03000 + HV | → | HO + CO2 + <1RO2_2> + D02000                                                                      | 40100 | 1.0 |
| HK3000 + HV | → | HO + <2NONO2_AC> + CO2 + CH2O                                                                     | 31900 | 1.0 |
| HK3000 + HV | → | HO + <2NONO2_AC> + CO2 + CH2O                                                                     | 40100 | 1.0 |
| AN2000 + HV | → | 0.992 HO + 0.008 HO2 + NO2 + 0.992 CO + 0.992 CH2O + 0.008 AD2000                                 | 10100 | 1.0 |
| NN3001 + HV | → | NO2 + CO2 + <1_2NO2_A> + 2.000 CH2O                                                               | 10100 | 2.0 |
| NN3001 + HV | → | NO2 + CO2 + <1_2NO2_A> + 2.000 CH2O                                                               | 30100 | 1.0 |
| ACROL + HV  | → | HO2 + 0.917 CO + CO2 + <1RO2_A> + 0.917 CH2O + 0.083 GLYOX                                        | 4000  | 1.0 |
| ACROL + HV  | → | 2.000 HO2 + 1.917 CO + 0.917 CH2O + 0.083 GLYOX                                                   | 4100  | 1.0 |
| ACROL + HV  | → | 0.520 HO + 1.520 CO + 0.140 CO2 + 0.340 A02000 + 0.140 CH4 + 0.520 CH3O2                          | 4200  | 1.0 |
| DK3000 + HV | → | HO2 + CO + CO2 + <1RO2_A> + CH2O                                                                  | 21400 | 1.0 |
| DK3000 + HV | → | CO + D02000                                                                                       | 21500 | 1.0 |
| DK3000 + HV | → | 2.000 CO + CH3OH                                                                                  | 21600 | 1.0 |
| DD3002 + HV | → | HO2 + 2.000 CO + CO2 + <1RO2_A>                                                                   | 21400 | 2.0 |
| DD3002 + HV | → | CO + GLYOX                                                                                        | 21500 | 2.0 |
| DD3002 + HV | → | 2.000 CO + CH2O                                                                                   | 21600 | 2.0 |

---

## Reference compounds and reaction types used to assign photolysis parameters for each label

| Reference compound | Label | Photolysis pathway                                                    |
|--------------------|-------|-----------------------------------------------------------------------|
| DCB2               | 12    | DCB2 $\rightarrow$ product (see SAPRC99 reactions)                    |
| DCB3               | 13    | DCB3 $\rightarrow$ product (see SAPRC99 reactions)                    |
| BENZAL             | 14    | BALD $\rightarrow$ nothing (see SAPRC99 reactions)                    |
| C3H7ONO2           | 400   | i-C3H7ONO2 + hv $\rightarrow$ i-C3H7O. + NO2                          |
| 2-C5H11ONO2        | 900   | 2-C5H11ONO2 + hv $\rightarrow$ 2-C5H11HO. + NO2                       |
| PAN                | 1400  | PAN + hv $\rightarrow$ CH3C(O)OO. + NO2                               |
| CH3CHO             | 1700  | CH3CHO + hv $\rightarrow$ CH3. + CHO.                                 |
| C2H5CHO            | 1800  | C2H5CHO + hv $\rightarrow$ C2H5. + CHO.                               |
| n-C3H7CHO          | 1900  | n-C3H7CHO + hv $\rightarrow$ n-C3H7. + CHO.                           |
| n-C3H7CHO          | 2000  | n-C3H7CHO + hv $\rightarrow$ C2H4 + CH3CHO Norrish II                 |
| i-C3H7CHO          | 2100  | i-C3H7CHO + hv $\rightarrow$ C3H7. + CHO.                             |
| acetone            | 3000  | Acetone + hv $\rightarrow$ CH3CO + CH3                                |
| CH3COC2H5          | 3100  | CH3COC2H5 + hv $\rightarrow$ C2H5. + CH3CO.                           |
| CH3COC2H5          | 3200  | CH3COC2H5 + hv $\rightarrow$ CH3. + C2H5CO.                           |
| CH3COCH2CH(CH3)2   | 3600  | CH3COCH2CH(CH3)2 + hv $\rightarrow$ CH3CO. + CH2(.)                   |
| CH3COCH2CH(CH3)2   | 3700  | CH3COCH2CH(CH3)2 + hv $\rightarrow$ CH3COCH3 + CH2=CH(CH3) Norrish II |
| CH2=CHCHO          | 4000  | CH2=CHCHO + hv $\rightarrow$ CH2CH=CHCO. + HO2.                       |
| CH2=CHCHO          | 4100  | CH2=CHCHO + hv $\rightarrow$ CH2=CH. + CHO.                           |
| CH2=CHCHO          | 4200  | CH2=CHCHO + hv $\rightarrow$ CH3C(.)H + CO                            |
| CH2=C(CH3)CHO      | 4300  | CH2=C(CH3)CHO + hv $\rightarrow$ CH2=C(.)CH3 + CHO.                   |
| CH2=C(CH3)CHO      | 4400  | CH2=C(CH3)CHO + hv $\rightarrow$ CH3C(.)CH3 + CO                      |
| CH2=C(CH3)CHO      | 4500  | CH2=C(CH3)CHO + hv $\rightarrow$ CH2=C(CH3)C(.)O                      |
| CH2=CHCOCH3        | 4900  | CH2=CHCOCH3 + hv $\rightarrow$ CH2=CHCH3 + CO                         |
| CH2=CHCOCH3        | 5000  | CH2=CHCOCH3 + hv $\rightarrow$ CH2=CH. + CH3CO.                       |
| CHOCHO             | 5100  | CHOCHO + hv $\rightarrow$ H2 + 2CO                                    |
| CHOCHO             | 5200  | CHOCHO + hv $\rightarrow$ 2 CHO.                                      |
| CHOCHO             | 5300  | CHOCHO + hv $\rightarrow$ HCHO + CO                                   |
| CH3COCHO           | 5400  | CH3COCHO + hv $\rightarrow$ CHO. + CH3CO.                             |
| CH3COCHO           | 5500  | CH3COCHO + hv $\rightarrow$ CO + CH3CHO                               |
| CH3COCHO           | 5600  | CH3COCHO + hv $\rightarrow$ 2 CO + CH4                                |
| CH3COCOCH3         | 5700  | CH3COCOCH3 + hv $\rightarrow$ 2 CH3CO.                                |
| OHCH2CHO           | 7400  | OHCH2CHO + hv $\rightarrow$ OHCH2. + .CHO                             |
| CHOCOOH            | 7800  | CHOCOOH + hv $\rightarrow$ CO2 + HCHO                                 |
| CHOCOOH            | 7900  | CHOCOOH + hv $\rightarrow$ 2 CO + H2O                                 |
| 1-C4H9ONO2         | 10100 | 1-C5H11ONO2 + hv $\rightarrow$ 1-C5H11HO. + NO2                       |
| 2-C4H9ONO2         | 10200 | 2-C4H9ONO2 + hv $\rightarrow$ 2-C4H9O. + NO2                          |
| aldehyde           | 20300 | linear aldehyde (no gamma-H + Calpha primary)                         |
| RCOCHO             | 21400 | RCOCHO + hv $\rightarrow$ RC(.)O + CHO.                               |
| CH3COCHO           | 21500 | CH3COCHO + hv $\rightarrow$ CO + RCHO                                 |
| CH3COCHO           | 21600 | CH3COCHO + hv $\rightarrow$ 2 CO + RH                                 |
| n-ketone           | 30100 | n-ketone (no gammaH) + hv $\rightarrow$ RC(.)O + R.                   |
| n-ketone           | 30200 | n-ketone + hv $\rightarrow$ RC(.)O + R.                               |
| n-ketone           | 30300 | n-ketone + hv $\rightarrow$ Norrish II                                |
| CH2=CHCOCH3        | 31600 | CH2=CHCOCH3 + hv $\rightarrow$ = + CO                                 |
| CH2=CHCOCH3        | 31700 | CH2=CHCOCH3 + hv $\rightarrow$ =. + RC(.)O                            |
| OHCH2COR           | 31900 | OHCH2COR + hv $\rightarrow$ RC(.)O + C(OH)(.)H2                       |
| CH3OOH             | 40100 | CH3OOH + hv $\rightarrow$ CH3O. + OH.                                 |

# Bibliography

- R. Atkinson, D. L. Baulch, R.A. Cox, R.F. Hampson, J.A. Kerr, .M.J. Rossi, and J. Troe. Evaluated kinetics and photochemical data for atmospheric chemistry, Organic species : Supplement V. Journal of Physical Chemistry Reference Data, 26(521), 1997.
- R. Atkinson, D. L. Baulch, Cox R.A., Hampson R.F., Kerr J.A., and Rossi M.J. Evaluated kinetics and photochemical data for atmospheric chemistry, Organic species : Supplement VII. Journal of Physical Chemistry Reference Data, 28:191–392, 1999.
- W.P.L. Carter. Documentation of the SAPRC-99 chemical mechanism for VOC reactivity assessment, 2000.
- W.B. De More, S.P. Sander, D.M. Golden, R.F. Hampson, M.J. Kurylo, C.J. Howard, A.R. Ravishankara, C.E. Kolb, and M.J. Molina. Chemical Kinetics and Photochemical Data for Use in Stratospheric Modeling. Jet Propulsion Laboratory, 1997.
- S.P. Sander, R.R. Friedl, W.B. De More, D.M. Golden, R.F. Hampson, R.E. Huie, M.J. Kurylo, G.K. Moortgat, A.R. Ravishankara, C.E. Kolb, and M.J. Molina. Chemical Kinetics and Photochemical Data for Use in Stratospheric Modeling. Jet Propulsion Laboratory, 2000.
- J. Stutz, E.S. Kim, U. Platt, P. Bruno, C. Perrino, and A. Febo. UV-visible absorption cross sections of nitrous acid. Journal of Geophysical Research, 105:14585–14592, 2000.
- J. Troe. Analysis of the temperature and pressure dependance of the reaction  $\text{HO} + \text{NO}_2 + \text{M} \rightleftharpoons \text{HONO}_2 + \text{M}$ . International Journal of Chemical Kinetics, 33:878–879, 2001.
- G.S. Tyndall, R.A. Cox, C. Granier, R. Lesclaux, G.K. Moortgat, M.J. Pilling, A.R. Ravishankara, and T.J. Wallington. Atmospheric chemistry of small organic peroxy radicals. Journal of Geophysical Research, 106:12157–12182, 2001.
